# Supplementary material for: Fungal Depsides—Naturally Inspiring Molecules: Biosynthesis, Structural Characterization, and Biological Activities
Source: MDPI journal article supplement (doi:10.3390/metabo11100683), 2021-10-05
Supplement: s1 [file s1]

# Fungal Depsides Naturally Inspiring Molecules: Biosynthesis, Structural Characterization, and Biological Activities

Sabrin R.M. Ibrahim<sup>1,2\*</sup>, Alaa Sirwi<sup>3</sup>, Basma G. Eid<sup>4</sup>, Shaimaa G.A. Mohamed<sup>5</sup>, Gamal A. Mohamed<sup>3,6</sup>

<sup>1</sup> Batterjee Medical College, Preparatory Year Program, Jeddah 21442, Saudi Arabia; sabrin.ibrahim@bmc.edu.sa)

<sup>2</sup> Department of Pharmacognosy, Faculty of Pharmacy, Assiut University, Assiut 71526, Egypt; sabreen.ibrahim@pharm.aun.edu.eg

<sup>3</sup> Department of Natural Products and Alternative Medicine, Faculty of Pharmacy, King Abdulaziz University, Jeddah 21589, Saudi Arabia; asirwi@kau.edu.sa; gahusseini@kau.edu.sa

<sup>4</sup> Department of Pharmacology and Toxicology, Faculty of Pharmacy, King Abdulaziz University, Jeddah 21589, Saudi Arabia; beid@kau.edu.sa

<sup>5</sup> Faculty of Dentistry, British University, El Sherouk City, Suez Desert Road, Cairo 11837, Egypt; shaimaag1973@gmail.com

<sup>6</sup> Department of Pharmacognosy, Faculty of Pharmacy, Al-Azhar University, Assiut Branch, Assiut 71524, Egypt; gamals2001@yahoo.com

\* Correspondence: sabrin.ibrahim@bmc.edu.sa; sabrinshaur@gmail.com; Tel.: +966 581183034

Received: date; Accepted: date; Published: date

**Table S1:** Physical and spectral data of fungal depsides

|                                                                                                                      |                                                                                                                                                                                                                                                                                                                                                                                                                       |
|----------------------------------------------------------------------------------------------------------------------|-----------------------------------------------------------------------------------------------------------------------------------------------------------------------------------------------------------------------------------------------------------------------------------------------------------------------------------------------------------------------------------------------------------------------|
| <p><b>Lecanoric acid (1)</b></p> 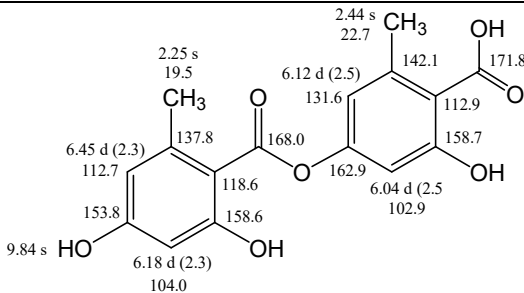   | <p>Colorless solid; UV (MeCN) <math>\lambda_{max}</math>: 236, 258, 290 nm; ESIHCDHRMS: <math>m/z</math> 317.0662, <math>[M-H]^-</math> (calcd for <math>C_{16}H_{13}O_7</math>, <math>m/z</math> 317.0661; <math>^1H</math> NMR and <math>^{13}C</math> NMR (600 and 150 MHz, DMSO-<math>d_6</math>) [37].</p>                                                                                                       |
| <p><b>Ethyl lecanorate (2)</b></p>  | <p>Colorless solid; UV (MeCN) <math>\lambda_{max}</math>: 238, 257, 299 nm; ESIHCDHRMS: <math>m/z</math> 345.0978 <math>[M-H]^-</math> (calcd for <math>C_{18}H_{17}O_7</math>, 345.0974); <math>^1H</math> and <math>^{13}C</math> NMR (600 and 150 MHz, MeCN-<math>d_3</math>) [37].</p>                                                                                                                            |
| <p><b>Aspergicide A (3)</b></p>   | <p>Colorless solid; mp 187–188 °C; UV (MeOH) <math>\lambda_{max}</math> (log <math>\epsilon</math>): 263 (3.57), 300 (3.30) nm; IR (neat) <math>\gamma_{max}</math> 3342, 1726 <math>cm^{-1}</math>; HRESIMS: <math>m/z</math> <math>[M+Na]^+</math> 351.1208 (calcd for <math>C_{19}H_{20}O_5Na</math>, 351.1208); <math>^1H</math> and <math>^{13}C</math> NMR (300 and 75 MHz, acetone-<math>d_6</math>) [38].</p> |
| <p><b>Aspergicide B (4)</b></p>   | <p>Colorless gum; UV (MeOH) <math>\lambda_{max}</math> (log <math>\epsilon</math>): 262 (3.49), 308 (3.24) nm; IR (neat) <math>\gamma_{max}</math> 3406, 1723, 1710 <math>cm^{-1}</math>; HRESIMS: <math>m/z</math> 411.0843 <math>[M+K]^+</math> (calcd for <math>C_{20}H_{20}O_7K</math>, 411.0846); <math>^1H</math> and <math>^{13}C</math> NMR (500 and 125 MHz, acetone-<math>d_6</math>) [38].</p>             |
| <p><b>Aspergicide C (5)</b></p>                                                                                      |                                                                                                                                                                                                                                                                                                                                                                                                                       |

|                                                                                       |                                                                                                                                                                                                                                                                                                                                                                                                                                                                                                                                                                                                         |
|---------------------------------------------------------------------------------------|---------------------------------------------------------------------------------------------------------------------------------------------------------------------------------------------------------------------------------------------------------------------------------------------------------------------------------------------------------------------------------------------------------------------------------------------------------------------------------------------------------------------------------------------------------------------------------------------------------|
|                                                                                       | <p>Colorless solid; mp 211–213 °C; <math>[\alpha]_D^{24}</math> −57.0 (c 0.1, MeOH); UV (MeOH) <math>\lambda_{max}</math> (log <math>\epsilon</math>): 261 (3.56), 300 (3.01) nm; IR (neat) <math>\gamma_{max}</math>: 3406, 1736, 1721 <math>\text{cm}^{-1}</math>; HRESIMS: <math>m/z</math> 449.1576 <math>[\text{M}+\text{Na}]^+</math> (calcd for <math>\text{C}_{24}\text{H}_{26}\text{O}_7\text{Na}</math>, 449.1576); <math>^1\text{H}</math> and <math>^{13}\text{C}</math> NMR (300 and 75 MHz, <math>\text{CDCl}_3</math>) [38].</p>                                                         |
| <p><b>Lecanorin D (6)</b></p>                                                         | <p>White powder; UV (MeOH) <math>\lambda_{max}</math>: 217, 268, 305 nm; HRESIMS: <math>m/z</math> 301.1078 <math>[\text{M}-\text{H}]^-</math> (calcd for <math>\text{C}_{17}\text{H}_{17}\text{O}_5</math>, 301.1076); <math>^1\text{H}</math> NMR and <math>^{13}\text{C}</math> NMR (800 and 200 MHz, <math>\text{CD}_3\text{OD}</math>) [19].</p>                                                                                                                                                                                                                                                   |
| <p><b>Lecanorin E (7)</b></p>                                                         | <p>White powder; UV (MeOH) <math>\lambda_{max}</math>: 222, 269, 305 nm; HRESIMS <math>m/z</math>: 287.0920 <math>[\text{M}-\text{H}]^-</math> (calcd for <math>\text{C}_{16}\text{H}_{15}\text{O}_5</math>, 287.0920); <math>^1\text{H}</math> NMR and <math>^{13}\text{C}</math> NMR (500 and 125 MHz, <math>\text{CD}_3\text{OD}</math>) [19].</p>                                                                                                                                                                                                                                                   |
| <p><b>Lecanorin F (8)</b></p>                                                         | <p>White powder; UV (MeOH) <math>\lambda_{max}</math>: 218, 275, 312 nm; HRESIMS <math>m/z</math>: 287.0922 <math>[\text{M}-\text{H}]^-</math> (calcd for <math>\text{C}_{16}\text{H}_{15}\text{O}_5</math>, 287.0920); <math>^1\text{H}</math> NMR and <math>^{13}\text{C}</math> NMR (800 and 200 MHz, <math>\text{CD}_3\text{OD}</math>) [19].</p>                                                                                                                                                                                                                                                   |
| <p><b>68- 3-Hydroxy-2,5-dimethylphenyl 2,4-dihydroxy-3,6-dimethylbenzoate (9)</b></p> | <p>White amorphous powder; UV (MeOH) <math>\lambda_{max}</math>: 222 (4.43), 276 (4.17), 306 (3.87) nm. IR (KBr) <math>\gamma_{max}</math>: 3421, 2925, 1652, 1643, 1635, 1271, 1155 <math>\text{cm}^{-1}</math>; ESIMS: <math>m/z</math> 301 (5, <math>[\text{M}-\text{H}]^-</math>), 163 (100). ESITOFMS: <math>m/z</math> 301.1067 (<math>[\text{M}-\text{H}]^-</math>, <math>\text{C}_{17}\text{H}_{17}\text{O}_5</math>; Calcd 301.1076); <math>^1\text{H}</math> and <math>^{13}\text{C}</math> NMR (400 and 100 MHz, <math>\text{CDCl}_3</math> and <math>\text{CD}_3\text{OD}</math>) [49].</p> |
| <p><b>3-Hydroxy-2,4,5-trimethylphenyl 2,4-dihydroxy-3,6-dimethylbenzoate (10)</b></p> |                                                                                                                                                                                                                                                                                                                                                                                                                                                                                                                                                                                                         |

|                                                                                                                                                                                                                                                                                                                                                                                                                                                                                                                                                     |                                                                                                                                                                                                                                                                                                                                                                                                                                                                                                           |
|-----------------------------------------------------------------------------------------------------------------------------------------------------------------------------------------------------------------------------------------------------------------------------------------------------------------------------------------------------------------------------------------------------------------------------------------------------------------------------------------------------------------------------------------------------|-----------------------------------------------------------------------------------------------------------------------------------------------------------------------------------------------------------------------------------------------------------------------------------------------------------------------------------------------------------------------------------------------------------------------------------------------------------------------------------------------------------|
| <p>Detailed description: Chemical structure of Colletotric acid C (11). It consists of two substituted benzene rings connected by an ester linkage. The left ring has a methyl group at position 2, a hydroxyl group at position 3, another methyl group at position 4, and a carboxylic acid group at position 5. The right ring has a methyl group at position 1, a hydroxyl group at position 2, a methyl group at position 3, and an ester group at position 4. Numerous NMR values are provided for both <sup>1</sup>H and <sup>13</sup>C.</p> | <p>White amorphous powder; UV (MeOH) <math>\lambda_{max}</math>: 222 (4.43), 274 (4.19), 308 (3.85) nm; IR (KBr) <math>\gamma_{max}</math>: 3421, 2979, 1652, 1647, 1635, 1627, 1271, 1155 cm<sup>-1</sup>; ESIMS: <math>m/z</math> 315 (2, [M-H]<sup>-</sup>), 163 (100); ESITOFMS: <math>m/z</math> 315.1227 [M-H]<sup>-</sup> (calcd for C<sub>18</sub>H<sub>19</sub>O<sub>5</sub>, 315.1232); <sup>1</sup>H and <sup>13</sup>C NMR (400 and 100 MHz, CDCl<sub>3</sub> and CD<sub>3</sub>OD) [49].</p> |
| <p>Detailed description: Chemical structure of Agonodepside A (12). It features two substituted benzene rings linked by an ester bond. The left ring is substituted with a methoxy group, two methyl groups, and a hydroxyl group. The right ring also has a methyl group, a hydroxyl group, and a methoxycarbonyl group. Extensive NMR data are listed for both isotopes.</p>                                                                                                                                                                      | <p>White solid; IR (KBr) <math>\gamma_{max}</math>: 3346, 2866, 1783, 1672, 1638, 1445, 1311, 1237, 1150, 1065, 981 cm<sup>-1</sup>; HRESIMS: <math>m/z</math> 389.1595 [M+H]<sup>+</sup> (calcd for 389.1522, C<sub>21</sub>H<sub>26</sub>O<sub>7</sub>); <sup>1</sup>H NMR and <sup>13</sup>C NMR (500 and 125 MHz, CD<sub>3</sub>OD) [46].</p>                                                                                                                                                         |
| <p>Detailed description: Chemical structure of Agonodepside B (13). This molecule contains two substituted benzene rings connected via an ester linkage. Both rings are heavily substituted with methyl groups and hydroxyl groups. Detailed NMR data are provided throughout the structure.</p>                                                                                                                                                                                                                                                    | <p>White powder; UV (MeOH) <math>\lambda_{max}</math> (log ε): 214 (4.57), 275 (4.16), 315 (2.82) nm; IR (KBr) <math>\gamma_{max}</math>: 3400, 2960, 1725, 1635 cm<sup>-1</sup>; ESIMS: <math>m/z</math> 381 [M-H]<sup>-</sup>, 203; HRMS: <math>m/z</math> 381.1689 [M-H]<sup>-</sup> (calcd for C<sub>23</sub>H<sub>25</sub>O<sub>5</sub>, 381.1697); <sup>1</sup>H and <sup>13</sup>C NMR (500 and 125 MHz, DMSO-<i>d</i><sub>6</sub>) [50].</p>                                                      |
| <p>Detailed description: Chemical structure of Guisinol (14). It shows two substituted benzene rings joined by an ester group. The left ring has a methyl group and a hydroxyl group. The right ring has a methyl group, a hydroxyl group, and a carboxylic acid group. NMR data are indicated on the structure.</p>                                                                                                                                                                                                                                | <p>White powder; UV (MeOH) <math>\lambda_{max}</math> (log ε): 214 (4.57), 275 (4.16), 315 (2.82) nm; IR (KBr) <math>\gamma_{max}</math>: 3400, 2960, 1725, 1635 cm<sup>-1</sup>; ESIMS: <math>m/z</math> 381 [M-H]<sup>-</sup>, 203; HRMS: <math>m/z</math> 381.1689 (calcd for C<sub>23</sub>H<sub>25</sub>O<sub>5</sub>, 381.1697); <sup>1</sup>H and <sup>13</sup>C NMR (500 and 125 MHz, DMSO-<i>d</i><sub>6</sub>) [50 ].</p>                                                                       |

|                                            |                                                                                                                                                                                                                                                                                                                                                                                                                                                                                                                          |
|--------------------------------------------|--------------------------------------------------------------------------------------------------------------------------------------------------------------------------------------------------------------------------------------------------------------------------------------------------------------------------------------------------------------------------------------------------------------------------------------------------------------------------------------------------------------------------|
|                                            | <p>Yellowish oil; UV (MeOH) <math>\lambda_{max}</math> (log <math>\epsilon</math>): 318 (3.81), 254 (4.09), 216 sh (4.53) nm; HREIMS: <math>m/z</math> 416.1396 (calcd for <math>C_{23}H_{25}O_5Cl</math>) (11)/418 (4), 239 (100)/241 (38), 211 (14)/213 (5), 178 (89), 163 (21); <math>^1H</math> and <math>^{13}C</math> NMR (400 and 100 MHz, <math>CDCl_3</math>) [51].</p>                                                                                                                                         |
| <p><b>Thielavin Z<sub>7</sub> (15)</b></p> | <p>White powder; UV (ACN) <math>\lambda_{max}</math>: 215.8, 276.1, 308.9 nm; HRESIMS: <math>m/z</math> 375.1464 <math>[M+H]^+</math> (calcd. for <math>C_{20}H_{23}O_7</math>, 375.1438); <math>^1H</math> NMR and <math>^{13}C</math> NMR (500 and 125 MHz, <math>DMSO-d_6</math>) [52].</p>                                                                                                                                                                                                                           |
| <p><b>Sterenin J (16)</b></p>              | <p>Colorless oil (MeOH); UV (MeOH) <math>\lambda_{max}</math>: (log <math>\epsilon</math>): 272 (4.15) nm; <math>[\alpha]^{20}_D</math> -11.05 (c 0.5, MeOH); IR <math>\gamma_{max}</math>: 2985, 2925, 2667, 1718, 1654, 1618, 1583, 1449, 1305, 1252, 1202, 1169, 1094, 852, 795 <math>cm^{-1}</math>; HRTOFMS: <math>m/z</math> 403.1381 <math>[M+H]^+</math> (calcd. for <math>C_{21}H_{22}O_8H</math>, 403.1387); <math>^1H</math> NMR and <math>^{13}C</math> NMR (500 and 125 MHz, <math>CD_3OD</math>) [53].</p> |
| <p><b>Sterenin E (17)</b></p>              | <p>Brown amorphous powder (MeOH); UV (MeOH) <math>\lambda_{max}</math> (log <math>\epsilon</math>): 266 (4.21) nm; IR <math>\gamma_{max}</math>: 3360, 3071, 2979, 2938, 1700, 1685, 1641, 1617, 1585, 1441, 1310, 1284, 1157, 1096, 846 <math>cm^{-1}</math>; HRTOFMS: <math>m/z</math> 409.1258 <math>[M+Na]^+</math> (calcd. for <math>C_{21}H_{22}O_7Na</math>, 409.1258); <math>^1H</math> NMR and <math>^{13}C</math> NMR (500 and 125 MHz, <math>CD_3OD</math>) [53].</p>                                         |
| <p><b>Sterenin F (18)</b></p>              |                                                                                                                                                                                                                                                                                                                                                                                                                                                                                                                          |

|                                                                                                                                                                                                                                                                                                                                     |                                                                                                                                                                                                                                                                                                                                                                                                                                                                                                                                                           |
|-------------------------------------------------------------------------------------------------------------------------------------------------------------------------------------------------------------------------------------------------------------------------------------------------------------------------------------|-----------------------------------------------------------------------------------------------------------------------------------------------------------------------------------------------------------------------------------------------------------------------------------------------------------------------------------------------------------------------------------------------------------------------------------------------------------------------------------------------------------------------------------------------------------|
| 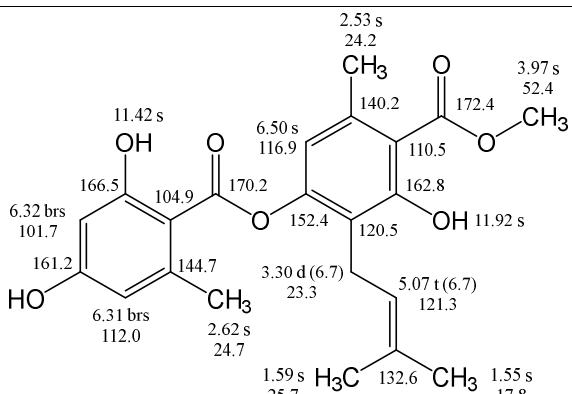 <p><sup>1</sup>H NMR and <sup>13</sup>C NMR (500 and 125 MHz, CDCl<sub>3</sub>) [53].</p>                                                                                                                                                         | <p>Brown amorphous powder (MeOH); UV (MeOH) <math>\lambda_{max}</math> (log <math>\epsilon</math>): 265 (4.51) nm; IR <math>\gamma_{max}</math>: 3370, 2928, 2855, 1663, 1617, 1443, 1403, 1377, 1310, 1250, 1195, 1149, 1095, 806 cm<sup>-1</sup>; HRTOFMS: <math>m/z</math> 423.1419 [M+Na]<sup>+</sup> (calcd. for C<sub>22</sub>H<sub>24</sub>O<sub>7</sub>Na, 423.1414; <sup>1</sup>H NMR and <sup>13</sup>C NMR (500 and 125 MHz, CDCl<sub>3</sub>) [53].</p>                                                                                       |
| <p><b>Sterenin G (19)</b></p>  <p><sup>1</sup>H NMR and <sup>13</sup>C NMR (500 and 125 MHz, CDCl<sub>3</sub>) [53].</p>                                                                                                                          | <p>Brown amorphous powder (MeOH); UV (MeOH) <math>\lambda_{max}</math> (log <math>\epsilon</math>): 260 (4.51) nm; IR <math>\gamma_{max}</math>: 3375, 2979, 2881, 1719, 1653, 1640, 1617, 1444, 1406, 1377, 1313, 1240, 1197, 1163, 1095, 846 cm<sup>-1</sup>; HRTOFMS: <math>m/z</math> 371.1489 [M+H]<sup>+</sup> (calcd. for C<sub>21</sub>H<sub>22</sub>O<sub>6</sub>H, 371.1489); <sup>1</sup>H NMR and <sup>13</sup>C NMR (500 and 125 MHz, CDCl<sub>3</sub>) [53].</p>                                                                            |
| <p><b>Sterenin H (20)</b></p>  <p><sup>1</sup>H NMR and <sup>13</sup>C NMR (500 and 125 MHz, CDCl<sub>3</sub>) [53].</p>                                                                                                                         | <p>Colorless oil (MeOH); UV (MeOH) <math>\lambda_{max}</math> (log <math>\epsilon</math>): 270 (4.23) nm; IR <math>\gamma_{max}</math>: 3306, 2971, 2931, 1658, 1621, 1586, 1445, 1426, 1376, 1312, 1254, 1198, 1166, 1097, 1009, 845, 792, 697 cm<sup>-1</sup>; HRTOFMS: <math>m/z</math> 425.1569 [M+Na]<sup>+</sup> (calcd. for C<sub>22</sub>H<sub>26</sub>O<sub>7</sub>Na, 425.1571); <sup>1</sup>H NMR and <sup>13</sup>C NMR (500 and 125 MHz, CDCl<sub>3</sub>) [53].</p>                                                                         |
| <p><b>Sterenin I (21)</b></p>  <p><sup>1</sup>H NMR and <sup>13</sup>C NMR (500 and 125 MHz, CD<sub>3</sub>OD); HRTOFMS: <math>m/z</math>: 527.1891 [M+Na]<sup>+</sup> (calcd. for C<sub>26</sub>H<sub>32</sub>O<sub>10</sub>Na, 527.1888).</p> | <p>Colorless oil (MeOH); UV (MeOH) <math>\lambda_{max}</math> (log <math>\epsilon</math>): 270 (1.73) nm; [<math>\alpha</math>]<sub>D</sub><sup>20</sup> +14.29 (c 0.3, MeOH); IR <math>\gamma_{max}</math>: 3370, 2973, 2951, 1721, 1658, 1621, 1586, 1444, 1426, 1376, 1311, 1255, 1201, 1169, 1098, 1043, 846, 792, 697 cm<sup>-1</sup>; <sup>1</sup>H NMR and <sup>13</sup>C NMR (500 and 125 MHz, CD<sub>3</sub>OD); HRTOFMS: <math>m/z</math>: 527.1891 [M+Na]<sup>+</sup> (calcd. for C<sub>26</sub>H<sub>32</sub>O<sub>10</sub>Na, 527.1888).</p> |
| <p><b>MS-3 (22)</b></p>                                                                                                                                                                                                                                                                                                             |                                                                                                                                                                                                                                                                                                                                                                                                                                                                                                                                                           |

|                                                                                                                                                                                |                                                                                                                                                                                                                                                                                                                                                                                                                                                                                                                                          |
|--------------------------------------------------------------------------------------------------------------------------------------------------------------------------------|------------------------------------------------------------------------------------------------------------------------------------------------------------------------------------------------------------------------------------------------------------------------------------------------------------------------------------------------------------------------------------------------------------------------------------------------------------------------------------------------------------------------------------------|
| 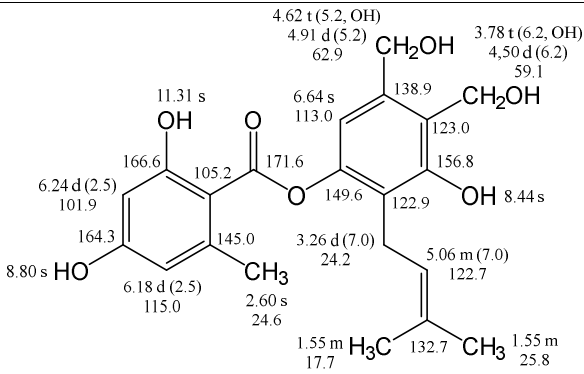 <p><sup>1</sup>H NMR and <sup>13</sup>C NMR (500 and 125 MHz, DMSO-<i>d</i><sub>6</sub>)</p> | <p>Colorless needle crystals; mp 92 °C; UV (MeOH) <math>\lambda_{max}</math> (<math>\epsilon</math>): 270 (23280), 305 (86300 nm; IR (KBr) <math>\gamma_{max}</math>: 3400, 2950, 1655, 1615, 1580, 1495, 1440, 1430, 1375, 1320, 1255, 1190, 1165, 1095, 1060, 1035, 990, 885, 845, 790, 695 cm<sup>-1</sup>; elemental analysis; 64.91 (C), 6.19 (H), 28.29 (O), C<sub>21</sub>H<sub>24</sub>O<sub>7</sub>; <sup>1</sup>H NMR and <sup>13</sup>C NMR (100 and 25 MHz, dioxane-<i>d</i><sub>8</sub>, CD<sub>3</sub>OD) [39,55, 56].</p> |
|  <p><sup>1</sup>H NMR and <sup>13</sup>C NMR (500 and 125 MHz, DMSO-<i>d</i><sub>6</sub>)</p> | <p>HRESIMS: <math>m/z</math> 777.3154 [M+H]<sup>+</sup> (calcd for C<sub>42</sub>H<sub>48</sub>O<sub>14</sub>, 777.3122); 799.2968 [M+Na]<sup>+</sup>; <sup>1</sup>H NMR and <sup>13</sup>C NMR (500 and 125 MHz, DMSO-<i>d</i><sub>6</sub>) [57,58]</p>                                                                                                                                                                                                                                                                                 |
| <p>4'-Hydroxy-5'-methoxy-6'-(3''-methyl-2''-butenyl)-phenyl-2,4-dihydroxy-6-methyl-benzoate (23)</p>                                                                           |  <p><sup>1</sup>H NMR and <sup>13</sup>C NMR (500 and 125 MHz, CDCl<sub>3</sub>) [40].</p>                                                                                                                                                                                                                                                                                                                                                            |
| <p>4'-Hydroxy-6'-(3''-methyl-2''-butenyl)-phenyl-2,4-dihydroxy-6-methyl-benzoate (24)</p>                                                                                      |  <p><sup>1</sup>H NMR and <sup>13</sup>C NMR (500 and 125 MHz, DMSO-<i>d</i><sub>6</sub>)</p>                                                                                                                                                                                                                                                                                                                                                         |
| <p>Nordivarcic acid (25)</p>                                                                                                                                                   | <p>Brown oil; UV (meOH) <math>\lambda_{max}</math> (log <math>\epsilon</math>): 213 (4.12), 268 (4.10), 302 (3.93) nm; IR (neat) <math>\gamma_{max}</math>: 3342, 2930, 1679, 1624, 1495, 1445 cm<sup>-1</sup>; HRTOFMS: <math>m/z</math> 329.1384 [M+H]<sup>+</sup> (calcd. for C<sub>19</sub>H<sub>21</sub>O<sub>5</sub>, 329.1385) [40].</p>                                                                                                                                                                                          |

|                                                                                                                                                                                                                                                                                                                                                                                                                                                                                                                                                                                 |                                                                                                                                                                                                                                                                                                                                                                                                                                                                          |
|---------------------------------------------------------------------------------------------------------------------------------------------------------------------------------------------------------------------------------------------------------------------------------------------------------------------------------------------------------------------------------------------------------------------------------------------------------------------------------------------------------------------------------------------------------------------------------|--------------------------------------------------------------------------------------------------------------------------------------------------------------------------------------------------------------------------------------------------------------------------------------------------------------------------------------------------------------------------------------------------------------------------------------------------------------------------|
| 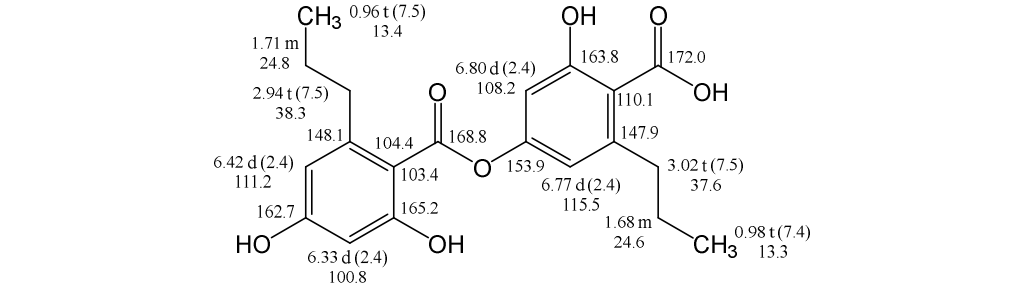 <p>Chemical structure of Divarinyll divarate (26) is shown with <sup>1</sup>H and <sup>13</sup>C NMR data. The structure features two phenolic rings linked by an ester group. The left ring has a hydroxyl group and a methyl group. The right ring has a hydroxyl group and a methyl group. The <sup>1</sup>H NMR data (in parentheses) and <sup>13</sup>C NMR data are provided for each proton and carbon.</p>                                                                           | <p>White amorphous powder; ES-IMS: <i>m/z</i> 373 [M-H]<sup>−</sup>; <sup>1</sup>H NMR and <sup>13</sup>C NMR (500 and 125 MHz, acetone-<i>d</i><sub>6</sub>) [25].</p>                                                                                                                                                                                                                                                                                                  |
| <p><b>Divarinyll divarate (26)</b></p>  <p>Chemical structure of Divarinyll divarate (26) is shown with <sup>1</sup>H and <sup>13</sup>C NMR data. The structure features two phenolic rings linked by an ester group. The left ring has a hydroxyl group and a methyl group. The right ring has a hydroxyl group and a methyl group. The <sup>1</sup>H NMR data (in parentheses) and <sup>13</sup>C NMR data are provided for each proton and carbon.</p>                                    | <p>White amorphous powder; ES-IMS: <i>m/z</i> 329 [M-H]<sup>−</sup>; <sup>1</sup>H NMR and <sup>13</sup>C NMR (500 and 125 MHz, acetone-<i>d</i><sub>6</sub>) [25].</p>                                                                                                                                                                                                                                                                                                  |
| <p><b>KS-501a (3-Heptyl-5-hydroxyphenyl 2-heptyl-4,6-dihydroxybenzoate) (27)</b></p>  <p>Chemical structure of KS-501a (27) is shown with <sup>1</sup>H and <sup>13</sup>C NMR data. The structure features two phenolic rings linked by an ester group. The left ring has a hydroxyl group and a methyl group. The right ring has a hydroxyl group and a methyl group. The <sup>1</sup>H NMR data (in parentheses) and <sup>13</sup>C NMR data are provided for each proton and carbon.</p> | <p>Colorless powder; EIMS: <i>m/z</i> 442 (M)<sup>+</sup>, 235, 208, 166, 137, 124; <sup>1</sup>H and <sup>13</sup>C NMR (400 and 100 MHz, CD<sub>3</sub>OD) [41,120].</p>                                                                                                                                                                                                                                                                                               |
| <p><b>KS-501a-2-O-β-D-galactopyranose (28)</b></p>  <p>Chemical structure of KS-501a-2-O-β-D-galactopyranose (28) is shown with <sup>1</sup>H and <sup>13</sup>C NMR data. The structure features two phenolic rings linked by an ester group. The left ring has a hydroxyl group and a methyl group. The right ring has a hydroxyl group and a methyl group. The <sup>1</sup>H NMR data (in parentheses) and <sup>13</sup>C NMR data are provided for each proton and carbon.</p>          | <p>White solid; mp 174-176 °C; [α]<sub>D</sub><sup>27</sup> -3.3 (c 0.10, MeOH); UV (MeOH) λ<sub>max</sub> (log ε): 203 (4.66), 255 (3.87) nm; IR (CHCl<sub>3</sub>) γ<sub>max</sub>: 3423, 926, 1728, 1613, 1592, 1465, 1260, 1073 cm<sup>−1</sup>; HRESITOF: <i>m/z</i> 627.3152 [M+Na]<sup>+</sup> (calcd for C<sub>33</sub>H<sub>48</sub>O<sub>10</sub>Na, 627.3145); <sup>1</sup>H and <sup>13</sup>C NMR (500 and 125 MHz, acetone-<i>d</i><sub>6</sub>) [41].</p> |
| <p><b>KS-501a-2-O-β-D-digalactopyranose (29)</b></p>  <p>Chemical structure of KS-501a-2-O-β-D-digalactopyranose (29) is shown with <sup>1</sup>H and <sup>13</sup>C NMR data. The structure features two phenolic rings linked by an ester group. The left ring has a hydroxyl group and a methyl group. The right ring has a hydroxyl group and a methyl group. The <sup>1</sup>H NMR data (in parentheses) and <sup>13</sup>C NMR data are provided for each proton and carbon.</p>      |                                                                                                                                                                                                                                                                                                                                                                                                                                                                          |



|                                                                                 |                                                                                                                                                                                                                                                                                                                                                                                                                                                                                                                                                                                                                                  |
|---------------------------------------------------------------------------------|----------------------------------------------------------------------------------------------------------------------------------------------------------------------------------------------------------------------------------------------------------------------------------------------------------------------------------------------------------------------------------------------------------------------------------------------------------------------------------------------------------------------------------------------------------------------------------------------------------------------------------|
| <p># in DMSO-<math>d_6</math></p>                                               |                                                                                                                                                                                                                                                                                                                                                                                                                                                                                                                                                                                                                                  |
| <p>Sugar part in <math>^1\text{H}</math> NMR DMSO-<math>d_6</math>, 500 MHz</p> | <p>Pale yellow solid; mp 200–202 °C; <math>[\alpha]_D^{26}</math> -10.6 (<math>c</math> 0.20, MeOH); UV (MeOH) <math>\lambda_{\text{max}}</math> (log <math>\epsilon</math>): 203 (5.10), 253 (4.26) nm; IR (CHCl<sub>3</sub>) <math>\gamma_{\text{max}}</math>: 3406, 2926, 1725, 1620, 1590, 1465, 1259, 1076 <math>\text{cm}^{-1}</math>; HRESITOF: <math>m/z</math> 789.3688 <math>[\text{M} + \text{Na}]^+</math> (calcd for C<sub>39</sub>H<sub>58</sub>O<sub>15</sub>Na, 789.3673); <math>^1\text{H}</math> and <math>^{13}\text{C}</math> NMR (500 and 125 MHz, acetone-<math>d_6</math>/D<sub>2</sub>O, 95:5) [41].</p> |
| <p><b>Arenicolin A (30)</b></p>                                                 | <p>Off-white solid; <math>[\alpha]_D</math> -29 (<math>c</math> 0.11, MeOH); UV (MeOH) <math>\lambda_{\text{max}}</math> (log <math>\epsilon</math>): 221 (4.3), 272 (4.1), 308 (3.8) nm; ECD (MeOH 4.8 mM) <math>\lambda_{\text{max}}</math> (<math>\Delta\epsilon</math>): 225 (-15), 240 (-56), 262 (+20), 272 (+2.5), 275 (-3.5), 311 (+8.2) nm; HRESIMS <math>m/z</math> 803.3495 <math>[\text{M}-\text{H}]^-</math> (calcd for C<sub>41</sub>H<sub>55</sub>O<sub>16</sub>, 803.3490); <math>^1\text{H}</math> NMR and <math>^{13}\text{C}</math> NMR (500 and 125 MHz, CD<sub>3</sub>OD) [42]</p>                          |
| <p><b>Arenicolin B (31)</b></p>                                                 |                                                                                                                                                                                                                                                                                                                                                                                                                                                                                                                                                                                                                                  |

|                                                                                                                                        |                                                                                                                                                                                                                                                                                                                                                                                                                                                                                                                                                                                                                            |
|----------------------------------------------------------------------------------------------------------------------------------------|----------------------------------------------------------------------------------------------------------------------------------------------------------------------------------------------------------------------------------------------------------------------------------------------------------------------------------------------------------------------------------------------------------------------------------------------------------------------------------------------------------------------------------------------------------------------------------------------------------------------------|
| 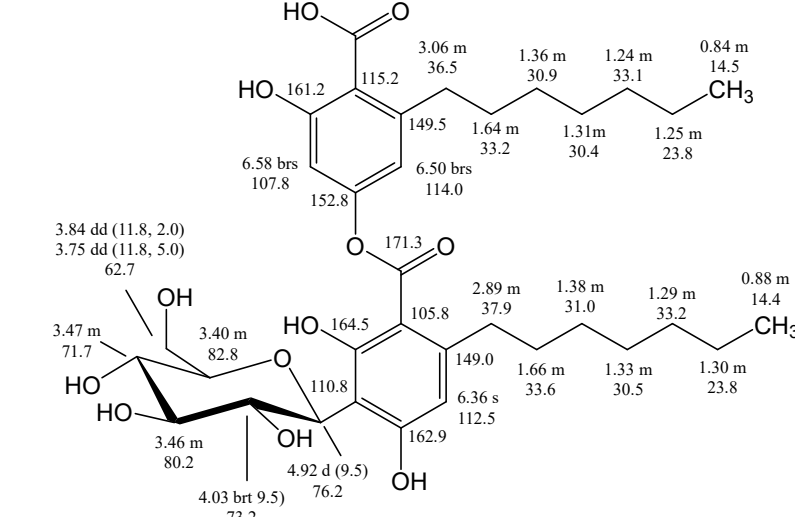                                                     | <p>Off-white solid; <math>[\alpha]_D^{+16}</math> (c 0.19, MeOH); UV (MeOH) <math>\lambda_{max}</math> (log <math>\epsilon</math>): 220 (4.4), 273 (4.1), 307 (3.9) nm; ECD (MeOH, 7.4 mM) <math>\lambda_{max}</math> (<math>\Delta\epsilon</math>) 217 (-16), 227 (-4.6), 250 (-2.7), 311 (+4.3) nm; HRESIMS: <math>m/z</math> 647.3064 <math>[M-H]^-</math> (calcd for <math>[C_{34}H_{48}O_{12}]</math>, 647.3068); <math>^1H</math> NMR and <math>^{13}C</math> NMR (500 and 125 MHz, <math>CD_3OD</math>) [42].</p>                                                                                                   |
| <p><b>72- Aquastatin A (32)</b></p>                 | <p>White solid; UV (MeOH) <math>\lambda_{max}</math> (<math>\epsilon</math>): 213 (52933), 265 (19033), 307 (10733) nm; IR (<math>CHCl_3</math>) <math>\gamma_{max}</math>: 2923, 2851, 1665, 1613, 1247, 1070 <math>cm^{-1}</math>; HRFABMS <math>m/z</math>: 677.3537 <math>[M+H]^+</math> (calcd for <math>C_{36}H_{52}O_{12}</math>, 677.3537) [103]. <math>^1H</math> and <math>^{13}C</math> NMR (400 and 100 MHz, <math>CDCl_3</math>); LRESIMS <math>m/z</math>: 675 <math>[M-H]^-</math>; HRESIMS <math>m/z</math>: 675.3350 <math>(M-H)^-</math> (calcd for <math>C_{36}H_{51}O_{12}</math>, 675.3381) [60].</p> |
| <p><b>Depsitinuside (33)</b></p>                   | <p>Colorless amorphous powder; IR (KBr) <math>\gamma_{max}</math>: 3475, 3120, 2920, 1720, 1610, 1560 nm; HRFABMS: <math>m/z</math> 589.3009 <math>[M-H]^-</math> (calcd for <math>C_{32}H_{45}O_{10}</math>, 589.3012); <math>^1H</math> NMR and <math>^{13}C</math> NMR (500 and 125 MHz, <math>CDCl_3</math>) [62].</p>                                                                                                                                                                                                                                                                                                 |
| <p><b>KS-501 (2-(<math>\beta</math>-D-galactofuranosyloxy)-6-heptyl-4-hydroxybenzoic acid 3-heptyl-5-hydroxyphenyl ester) (34)</b></p> |                                                                                                                                                                                                                                                                                                                                                                                                                                                                                                                                                                                                                            |

|                                                                                                                                                                                                                                                                                                                                                                                                                                                                                                                                                                                                                                                                                                                                                                                                                                                                                                                                              |                                                                                                                                                                                                                                                                                                                                                                                                                                                                                       |
|----------------------------------------------------------------------------------------------------------------------------------------------------------------------------------------------------------------------------------------------------------------------------------------------------------------------------------------------------------------------------------------------------------------------------------------------------------------------------------------------------------------------------------------------------------------------------------------------------------------------------------------------------------------------------------------------------------------------------------------------------------------------------------------------------------------------------------------------------------------------------------------------------------------------------------------------|---------------------------------------------------------------------------------------------------------------------------------------------------------------------------------------------------------------------------------------------------------------------------------------------------------------------------------------------------------------------------------------------------------------------------------------------------------------------------------------|
| 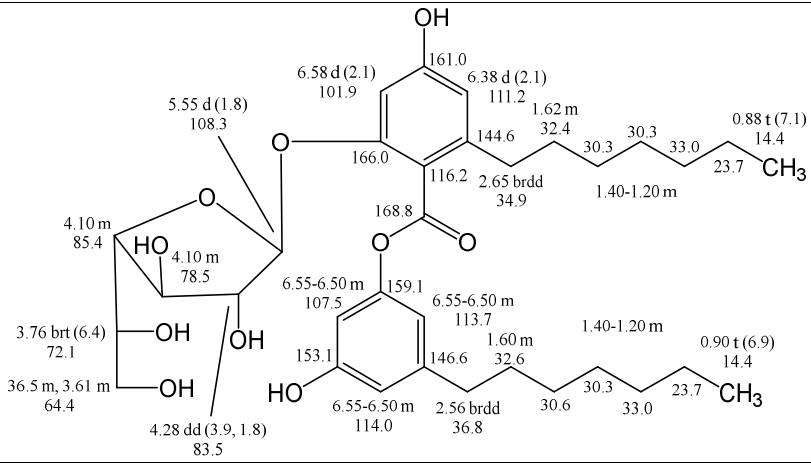                                                                                                                                                                                                                                                                                                                                                                                                                                                                                                                                                                                                                                                                                                                                                                                                                                                           | <p>Colorless powder; <math>[\alpha]_D^{23}</math> -53.0 (c 0.30, MeOH); UV (MeOH) <math>\lambda_{max}</math> (<math>\epsilon</math>): 207 (35000), 254 (6600), 278 (5000) nm; IR (CHCl<sub>3</sub>) <math>\gamma_{max}</math>: 3400, 1720, 1585, 1064 cm<sup>-1</sup>; HRFABMS <math>m/z</math>: 603.3169 [M+H]<sup>+</sup> (calcd for C<sub>33</sub>H<sub>47</sub>O<sub>10</sub>, 603.3170); <sup>1</sup>H and <sup>13</sup>C NMR (400 and 100 MHz, CD<sub>3</sub>OD) [63, 120].</p> |
| <p><b>KS-502 (2-(β-D-galactofuranosyloxy)6-heptyl-4-hydroxybenzoic acid 4-carboxy-3-heptyl-5-hydroxyphenyl ester) (35)</b></p>                                                                                                                                                                                                                                                                                                                                                                                                                                                                                                                                                                                                                                                                                                                            | <p>Colorless powder; <math>[\alpha]_D^{23}</math> -45.0 (c 0.30, MeOH); UV (MeOH) <math>\lambda_{max}</math> (<math>\epsilon</math>): 210 (56000), 245 (12000), 290 (6500) nm; IR (CHCl<sub>3</sub>) <math>\gamma_{max}</math>: 3450, 1724, 1595, 1057 cm<sup>-1</sup>; HRFABMS <math>m/z</math>: 647.3083 [M+H]<sup>+</sup> (calcd for C<sub>34</sub>H<sub>47</sub>O<sub>12</sub>, 647.3068); <sup>1</sup>H and <sup>13</sup>C NMR (400 and 100 MHz, CD<sub>3</sub>OD) [63,120].</p> |
| <p><b>CRM646-A (36)</b></p>                                                                                                                                                                                                                                                                                                                                                                                                                                                                                                                                                                                                                                                                                                                                                                                                                                                                                                                  |                                                                                                                                                                                                                                                                                                                                                                                                                                                                                       |
|                                                                                                                                                                                                                                                                                                                                                                                                                                                                                                                                                                                                                                                                                                                                                                                                                                                          |                                                                                                                                                                                                                                                                                                                                                                                                                                                                                       |
| <p>White solid; <math>[\alpha]_D^{20}</math> -41.5 (c 0.31, MeOH); IR (KBr) <math>\gamma_{max}</math>: 3397, 2900, 1730, 1666, 1614 cm<sup>-1</sup>; FABMS: <math>m/z</math> 689 [M-H]<sup>-</sup> (C<sub>36</sub>H<sub>50</sub>O<sub>13</sub>); <sup>1</sup>H and <sup>13</sup>C NMR (300 and 75 MHz, DMSO-<i>d</i><sub>6</sub>); <sup>1</sup>H NMR (300 MHz, DMSO-<i>d</i><sub>6</sub>): <math>\delta_H</math> 10.34 (brs, 1H), 6.57 (s, 1H), 6.49 (m, 3H), 5.70-5.20 (br, 2H), 5.05 (d, 1H, <i>J</i> = 7.5 Hz), 3.91 (d, 1H, <i>J</i> = 9.0 Hz), 3.46-3.30 (m, 3H), 2.65-2.60 (m, 2H), 2.45 (s, 3 H), 1.60-1.50 (m, 2H), 1.38-1.20 (m, 24H), 0.86 (m, 3H); <sup>13</sup>C NMR (75 MHz, CDCl<sub>3</sub>): <math>\delta_C</math> 171.3, 170.2, 166.4, 160.8, 159.4, 157.5, 152.5, 143.4, 140.6, 116.5, 114.3, 113.8, 108.6, 107.4, 101.5, 100.0, 76.0, 75.8, 73.1, 71.6, 33.7, 31.5, 31.1, 29.2, 29.0, 28.9, 22.3, 21.8, 14.1 [43,44].</p> |                                                                                                                                                                                                                                                                                                                                                                                                                                                                                       |
| <p><b>CRM646-B (37)</b></p>                                                                                                                                                                                                                                                                                                                                                                                                                                                                                                                                                                                                                                                                                                                                                                                                                                                                                                                  |                                                                                                                                                                                                                                                                                                                                                                                                                                                                                       |

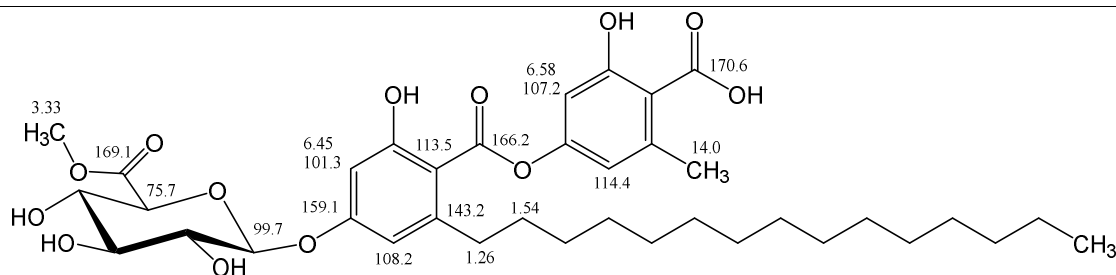

White solid;  $[\alpha]_D^{20}$  -29.7 (c 0.31, CD<sub>3</sub>COCD<sub>3</sub>); ESIMS:  $m/z$  703.3 [M-H]<sup>-</sup>; IR (KBr)  $\gamma_{max}$ : 3397, 2900, 1730, 1666, 1614 cm<sup>-1</sup>; FABMS (-):  $m/z$  703 [M-H]<sup>-</sup>, FABMS (-):  $m/z$  705 [M+H]<sup>+</sup>; HRESIMS:  $m/z$  727.3300 (calcd for C<sub>37</sub>H<sub>52</sub>O<sub>13</sub>Na, 727.3306); <sup>1</sup>H NMR (300 MHz, CD<sub>3</sub>COCD<sub>3</sub>):  $\delta_H$  6.58-6.55 (m, 3H), 6.45 (d, 1H,  $J$  = 1.8 Hz), 5.28 (d, 1H,  $J$  = 7.5 Hz), 4.22 (d, 1H,  $J$  = 9.6 Hz), 3.76-3.73 (m, 4H), 3.74-3.60 (m, 3H), 2.93 (t, 2H,  $J$  = 7.8 Hz), 2.65 (s, 3H), 1.65-1.60 (m, 2H), 1.35-1.25 (m, 24H), 0.88 (t, 3H,  $J$  = 6.8 Hz); <sup>13</sup>C NMR (75 MHz, CD<sub>3</sub>COCD<sub>3</sub>):  $\delta_C$  170.2, 165.2, 164.4, 162.6, 153.2, 148.5, 115.5, 112.3, 109.1, 108.4, 102.8, 101.1, 77.1, 76.7, 74.3, 72.7, 52.9, 37.2, 33.1, 32.9, 31.0, 30.7, 30.6, 30.5, 30.2, 29.9, 29.7, 29.4, 24.2, 23.6, 14.7 [43,44].

#### Sterenin A (38)

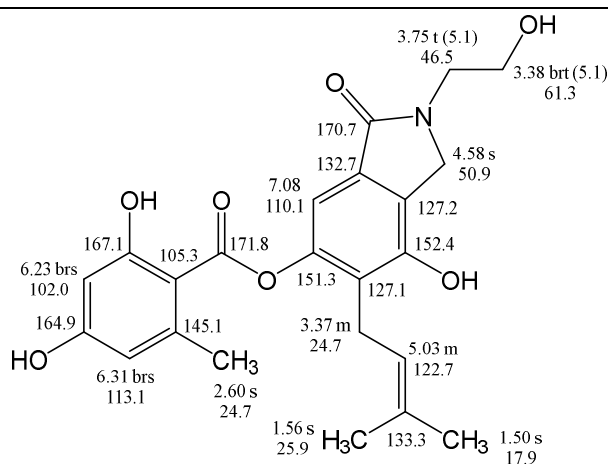

White powder; UV (MeOH)  $\lambda_{max}$  ( $\epsilon$ ): 212 (58600), 265 (24400), 297 (10900) nm; IR (KBr)  $\gamma_{max}$ : 3357, 3231, 2973, 2931, 1662, 1623, 1602, 1456, 1376, 1311, 1255, 1199, 1164, 1084, 1064, 1035, 990 cm<sup>-1</sup>; FABMS:  $m/z$  450 [M+Na]<sup>+</sup>; HRFABMS:  $m/z$  450.1526 [M+Na]<sup>+</sup> (calcd for C<sub>23</sub>H<sub>25</sub>NO<sub>7</sub>Na, 450.1529); <sup>1</sup>H NMR and <sup>13</sup>C NMR (500 and 125 MHz, CD<sub>3</sub>OD) [64].

#### Sterenin B (39)

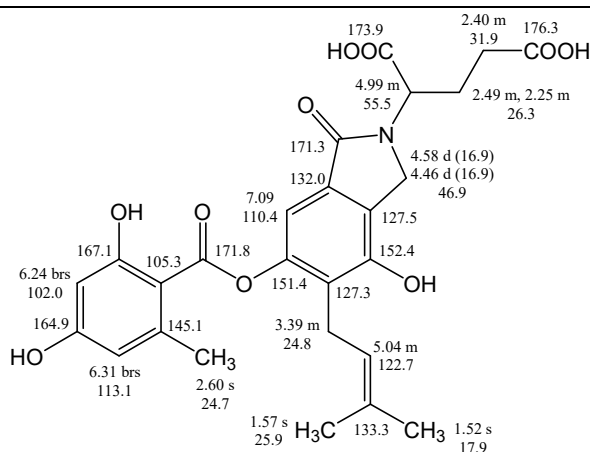

White powder;  $[\alpha]_D$  -16.3 (c 0.05, MeOH); UV (MeOH)  $\lambda_{max}$  ( $\epsilon$ ): 214 (58100), 265 (26500), 296 (11100) nm; IR (KBr)  $\gamma_{max}$ : 3348, 3264, 2973, 2928, 2858, 1718, 1662, 1624, 1603, 1450, 1413, 1377, 1310, 1254, 1198, 1162, 1087, 1063, 1035, 991 cm<sup>-1</sup>; FABMS  $m/z$ : 514 [M+H]<sup>+</sup>; HRFABMS:  $m/z$  514.1697 [M+H]<sup>+</sup> (calcd for C<sub>26</sub>H<sub>28</sub>NO<sub>10</sub>, 514.1713); <sup>1</sup>H NMR and <sup>13</sup>C NMR (500 and 125 MHz, CD<sub>3</sub>OD) [64].

#### Sterenin C (40)

|                                                                                                                   |                                                                                                                                                                                                                                                                                                                                                                                                                                                                                                                                                                                                                                                                                              |
|-------------------------------------------------------------------------------------------------------------------|----------------------------------------------------------------------------------------------------------------------------------------------------------------------------------------------------------------------------------------------------------------------------------------------------------------------------------------------------------------------------------------------------------------------------------------------------------------------------------------------------------------------------------------------------------------------------------------------------------------------------------------------------------------------------------------------|
| 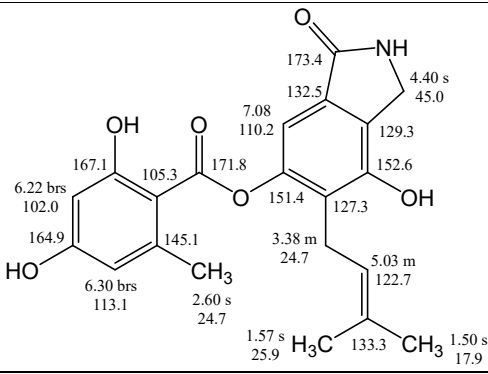                                 | <p>White powder; UV (MeOH) <math>\lambda_{max}</math> (<math>\epsilon</math>): 213 (66700), 268 (23000), 297 (12000) nm; IR (KBr) <math>\gamma_{max}</math>: 3409, 3267, 2974, 2931, 1669, 1653, 1623, 1599, 1504, 1446, 1413, 1374, 1349, 1313, 1255, 1193, 1173, 1161, 1100, 1063, 1038, 998, 989 <math>\text{cm}^{-1}</math>; FABMS: <math>m/z</math> 406 <math>[\text{M}+\text{Na}]^+</math>; HRFABMS: <math>m/z</math> 406.1273 <math>[\text{M}+\text{Na}]^+</math> (calcd for <math>\text{C}_{21}\text{H}_{21}\text{NO}_{10}\text{Na}</math>, 406.1267); <math>^1\text{H}</math> NMR and <math>^{13}\text{C}</math> NMR (500 and 125 MHz, <math>\text{CD}_3\text{OD}</math>) [64].</p> |
| <p><b>Sterenin D (41)</b></p>   | <p>White powder; UV (MeOH) <math>\lambda_{max}</math> (<math>\epsilon</math>): 213 (96200), 265 (41300), 297 (17500) nm; IR (KBr) <math>\gamma_{max}</math>: 3366, 3245, 2973, 2929, 2733, 1662, 1624, 1601, 1458, 1448, 1401, 1377, 1349, 1311, 1254, 1201, 1165, 1103, 1081, 1035, 995, 946 <math>\text{cm}^{-1}</math>; FABMS: <math>m/z</math> 442 <math>(\text{M}+\text{H})^+</math>; HRFABMS <math>m/z</math>: 442.1495 <math>[\text{M}+\text{H}]^+</math> (calcd for <math>\text{C}_{23}\text{H}_{24}\text{NO}_8</math>, 442.1502); <math>^1\text{H}</math> NMR and <math>^{13}\text{C}</math> NMR (500 and 125 MHz, <math>\text{CD}_3\text{OD}</math>) [64].</p>                     |
| <p><b>Sterenin K (42)</b></p>  | <p>White powder (MeOH); UV (MeOH) <math>\lambda_{max}</math> (<math>\log \epsilon</math>): 275 (3.41) nm; IR <math>\gamma_{max}</math>: 3202, 2972, 2930, 1709, 1661, 1601, 1447, 1311, 1254, 1200, 1162, 1104, 1058, 846, 792, 723 <math>\text{cm}^{-1}</math>; HRTOFMS: <math>m/z</math> 470.1809 <math>[\text{M}+\text{H}]^+</math> (calcd. for <math>\text{C}_{25}\text{H}_{27}\text{NO}_8</math>, 470.1809); <math>^1\text{H}</math> NMR and <math>^{13}\text{C}</math> NMR (500 and 125 MHz, <math>\text{CD}_3\text{OD}</math>) [53].</p>                                                                                                                                              |
| <p><b>Sterenin L (43)</b></p>                                                                                     |                                                                                                                                                                                                                                                                                                                                                                                                                                                                                                                                                                                                                                                                                              |

|                                                                                                                                                                                                                                                                                                                                                                                                                                                                                                           |                                                                                                                                                                                                                                                                                                                                                                                                                                                                                                                                                  |
|-----------------------------------------------------------------------------------------------------------------------------------------------------------------------------------------------------------------------------------------------------------------------------------------------------------------------------------------------------------------------------------------------------------------------------------------------------------------------------------------------------------|--------------------------------------------------------------------------------------------------------------------------------------------------------------------------------------------------------------------------------------------------------------------------------------------------------------------------------------------------------------------------------------------------------------------------------------------------------------------------------------------------------------------------------------------------|
| 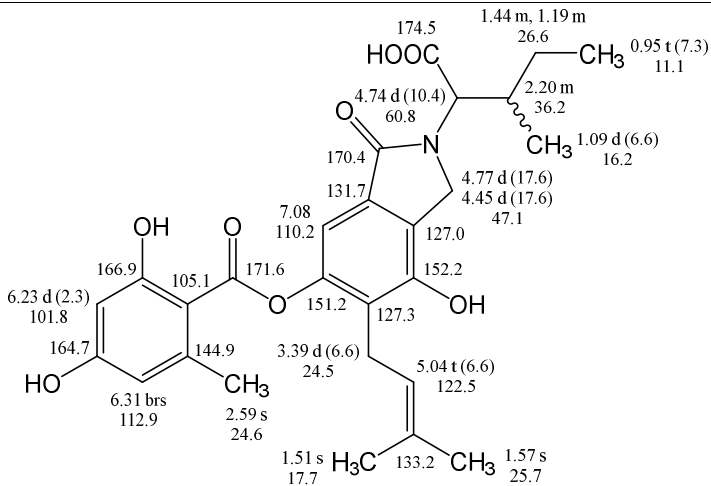 <p>Chemical structure of Sterenin M (44) with <sup>1</sup>H and <sup>13</sup>C NMR data. The structure is a complex polycyclic molecule with a central benzene ring, a carboxylic acid group, and a side chain with a methyl group. NMR data includes <sup>1</sup>H NMR (400 MHz, CD<sub>3</sub>OD) and <sup>13</sup>C NMR (125 MHz, CD<sub>3</sub>OD) peaks.</p>                                                       | <p>White powder (MeOH); UV (MeOH) <math>\lambda_{max}</math> (log <math>\epsilon</math>): 263 (2.52) nm; [<math>\alpha</math>]<sup>20</sup><sub>D</sub> -12.05 (c 0.2, MeOH); IR <math>\gamma_{max}</math>: 3193, 2964, 2925, 2874, 1718, 1658, 1623, 1601, 1455, 1310, 1253, 1199, 1160, 1093, 1063, 846, 791 cm<sup>-1</sup>; HRTOFMS: <math>m/z</math> 520.1940 [M+Na]<sup>+</sup> (calcd for C<sub>27</sub>H<sub>31</sub>NO<sub>8</sub>Na, 520.1942); <sup>1</sup>H NMR and <sup>13</sup>C NMR (500 and 125 MHz, CD<sub>3</sub>OD) [53].</p> |
| <p><b>Sterenin M (44)</b></p>  <p>Chemical structure of Sterenin M (44) with <sup>1</sup>H and <sup>13</sup>C NMR data. The structure is a complex polycyclic molecule with a central benzene ring, a carboxylic acid group, and a side chain with a methyl group. NMR data includes <sup>1</sup>H NMR (400 MHz, CD<sub>3</sub>OD) and <sup>13</sup>C NMR (125 MHz, CD<sub>3</sub>OD) peaks.</p>                        | <p>White powder (MeOH); UV (MeOH) <math>\lambda_{max}</math> (log <math>\epsilon</math>): 264 (3.45) nm; [<math>\alpha</math>]<sup>20</sup><sub>D</sub> -11.33 (c 0.3, MeOH); IR <math>\gamma_{max}</math>: 3368, 2923, 2869, 1711, 1654, 1637, 1599, 1450, 1310, 1253, 1198, 1158, 1093, 1071, 844, 795, 725 cm<sup>-1</sup>; HRTOFMS: <math>m/z</math> 498.2124 [M+H]<sup>+</sup> (calcd for C<sub>27</sub>H<sub>31</sub>NO<sub>8</sub>, 498.2122); <sup>1</sup>H NMR and <sup>13</sup>C NMR (500 and 125 MHz, CD<sub>3</sub>OD) [53].</p>     |
| <p><b>5- Colletotric acid A (45)</b></p>  <p>Chemical structure of 5- Colletotric acid A (45) with <sup>1</sup>H and <sup>13</sup>C NMR data. The structure is a complex polycyclic molecule with a central benzene ring, a carboxylic acid group, and a side chain with a methyl group. NMR data includes <sup>1</sup>H NMR (400 MHz, CD<sub>3</sub>OD) and <sup>13</sup>C NMR (125 MHz, CD<sub>3</sub>OD) peaks.</p> | <p>White solid; mp 85–86 °C; EIMS: <math>m/z</math> 193 (63.1), 151 (9.1), 124 (66.6), 45 (100); FABMS: <math>m/z</math> 525 [M+H]<sup>+</sup> (22), 375 (55), 343 (63); HRFABMS: <math>m/z</math> 525.1765 [M+H]<sup>+</sup> (calcd for C<sub>28</sub>H<sub>28</sub>O<sub>10</sub>, 525.1761); <sup>1</sup>H and <sup>13</sup>C NMR (DMSO-<i>d</i><sub>6</sub>, 400, 125 MHz) [46].</p>                                                                                                                                                         |
| <p><b>Colletotric acid B (46)</b></p>                                                                                                                                                                                                                                                                                                                                                                                                                                                                     |                                                                                                                                                                                                                                                                                                                                                                                                                                                                                                                                                  |

|                                                                                                                                                                                                                                                                                                                                                                                                                                                                                                                                                                                                                                                                                                                                                                                                                                                                                                                                                                                                                         |                                                                                                                                                                                                                                                                                                                                                         |
|-------------------------------------------------------------------------------------------------------------------------------------------------------------------------------------------------------------------------------------------------------------------------------------------------------------------------------------------------------------------------------------------------------------------------------------------------------------------------------------------------------------------------------------------------------------------------------------------------------------------------------------------------------------------------------------------------------------------------------------------------------------------------------------------------------------------------------------------------------------------------------------------------------------------------------------------------------------------------------------------------------------------------|---------------------------------------------------------------------------------------------------------------------------------------------------------------------------------------------------------------------------------------------------------------------------------------------------------------------------------------------------------|
| 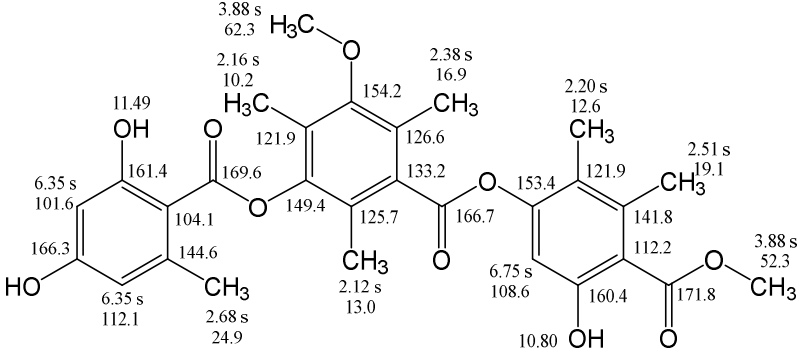 <p>Chemical structure of PS-990 (47) is shown with <sup>13</sup>C NMR (500 MHz, CDCl<sub>3</sub>) and <sup>1</sup>H NMR (125 MHz, CDCl<sub>3</sub>) data labels. The structure consists of three aromatic rings linked by ester groups. The left ring has a hydroxyl group and a methoxy group. The middle ring has a methoxy group and a methyl group. The right ring has a methoxy group and a methyl group. The <sup>13</sup>C NMR data labels are: 166.3, 161.4, 101.6, 6.35 s, 112.1, 104.1, 144.6, 121.9, 126.6, 133.2, 154.2, 149.4, 125.7, 12.6, 121.9, 141.8, 112.2, 171.8, 160.4, 108.6, 6.75 s, 10.80, 2.51 s, 19.1, 3.88 s, 52.3, 2.38 s, 16.9, 2.16 s, 10.2, 3.88 s, 62.3, 11.49, 6.35 s, 101.6, 166.3, 112.1, 6.35 s, 104.1, 144.6, 121.9, 126.6, 133.2, 154.2, 149.4, 125.7, 12.6, 121.9, 141.8, 112.2, 171.8, 160.4, 108.6, 6.75 s, 10.80, 2.51 s, 19.1, 3.88 s, 52.3, 2.38 s, 16.9, 2.16 s, 10.2, 3.88 s, 62.3.</p> | <p>Amorphous powder; IR (KBr) <math>\gamma_{\max}</math>: 3440, 2925, 2860, 1728, 1661, 1450, 1314, 1255, 1173, 1098, 988 cm<sup>-1</sup>; HRESIMS: <math>m/z</math> 537.1774 [M-H]<sup>-</sup> (calcd for 37.1766, C<sub>29</sub>H<sub>30</sub>O<sub>10</sub>); <sup>1</sup>H NMR and <sup>13</sup>C NMR (500 and 125 MHz, CDCl<sub>3</sub>) [46].</p> |
| <p><b>PS-990 (47)</b></p>  <p>Chemical structure of Thielavin A (48) is shown with <sup>13</sup>C NMR (500 MHz, CDCl<sub>3</sub>) and <sup>1</sup>H NMR (125 MHz, CDCl<sub>3</sub>) data labels. The structure consists of three aromatic rings linked by ester groups. The left ring has a hydroxyl group and a methoxy group. The middle ring has a methoxy group and a methyl group. The right ring has a methoxy group and a methyl group. The <sup>13</sup>C NMR data labels are: 166.3, 161.4, 101.6, 6.35 s, 112.1, 104.1, 144.6, 121.9, 126.6, 133.2, 154.2, 149.4, 125.7, 12.6, 121.9, 141.8, 112.2, 171.8, 160.4, 108.6, 6.75 s, 10.80, 2.51 s, 19.1, 3.88 s, 52.3, 2.38 s, 16.9, 2.16 s, 10.2, 3.88 s, 62.3.</p>                                                                                                                                                                                                          | <p>Colorless crystalline; mp 183–185 °C; UV (MeOH) <math>\lambda_{\max}</math>: 215, 257, 323 nm; IR (neat) <math>\gamma_{\max}</math>: 3452, 2931, 1734, 1716, 1701, 1662, 1576, 1464, 1313, 1151, 1095, 1074 cm<sup>-1</sup>; EIMS: <math>m/z</math> 179.2230 (calcd for C<sub>32</sub>H<sub>36</sub>O<sub>10</sub>) [66].</p>                        |
| <p><b>Thielavin A (48)</b></p>  <p>Chemical structure of Thielavin B (49) is shown with <sup>13</sup>C NMR (500 MHz, CDCl<sub>3</sub>) and <sup>1</sup>H NMR (125 MHz, CDCl<sub>3</sub>) data labels. The structure consists of three aromatic rings linked by ester groups. The left ring has a hydroxyl group and a methoxy group. The middle ring has a methoxy group and a methyl group. The right ring has a methoxy group and a methyl group. The <sup>13</sup>C NMR data labels are: 166.3, 161.4, 101.6, 6.35 s, 112.1, 104.1, 144.6, 121.9, 126.6, 133.2, 154.2, 149.4, 125.7, 12.6, 121.9, 141.8, 112.2, 171.8, 160.4, 108.6, 6.75 s, 10.80, 2.51 s, 19.1, 3.88 s, 52.3, 2.38 s, 16.9, 2.16 s, 10.2, 3.88 s, 62.3.</p>                                                                                                                                                                                                    | <p>White solid; UV (MeCN) <math>\lambda_{\max}</math>: 272, 315 nm; HRESIMS: <math>m/z</math> 537.1765 [M-H]<sup>-</sup> (calcd. for C<sub>29</sub>H<sub>29</sub>O<sub>10</sub>, 539.1772); <sup>1</sup>H and <sup>13</sup>C NMR (500 and 125 MHz, CDCl<sub>3</sub>/CD<sub>3</sub>OD, 7:3) [67].</p>                                                    |
| <p><b>Thielavin B (49)</b></p>  <p>Chemical structure of Thielavin B Methyl Ester (50) is shown with <sup>13</sup>C NMR (500 MHz, CDCl<sub>3</sub>) and <sup>1</sup>H NMR (125 MHz, CDCl<sub>3</sub>) data labels. The structure consists of three aromatic rings linked by ester groups. The left ring has a hydroxyl group and a methoxy group. The middle ring has a methoxy group and a methyl group. The right ring has a methoxy group and a methyl group. The <sup>13</sup>C NMR data labels are: 166.3, 161.4, 101.6, 6.35 s, 112.1, 104.1, 144.6, 121.9, 126.6, 133.2, 154.2, 149.4, 125.7, 12.6, 121.9, 141.8, 112.2, 171.8, 160.4, 108.6, 6.75 s, 10.80, 2.51 s, 19.1, 3.88 s, 52.3, 2.38 s, 16.9, 2.16 s, 10.2, 3.88 s, 62.3.</p>                                                                                                                                                                                       | <p>Yellowish powder; ESIMS: <math>m/z</math> 589.7 [M+Na]<sup>+</sup>, 565.7 [M-H]<sup>-</sup>; <sup>1</sup>H and <sup>13</sup>C NMR (400 and 100 MHz, CDCl<sub>3</sub>) [68].</p>                                                                                                                                                                      |
| <p><b>Thielavin B Methyl Ester (50)</b></p>                                                                                                                                                                                                                                                                                                                                                                                                                                                                                                                                                                                                                                                                                                                                                                                                                                                                                                                                                                             |                                                                                                                                                                                                                                                                                                                                                         |

|                                                                                                                                                                                                                                                                                        |                                                                                                                                                                                                                                                                                                                                                                                                |
|----------------------------------------------------------------------------------------------------------------------------------------------------------------------------------------------------------------------------------------------------------------------------------------|------------------------------------------------------------------------------------------------------------------------------------------------------------------------------------------------------------------------------------------------------------------------------------------------------------------------------------------------------------------------------------------------|
| 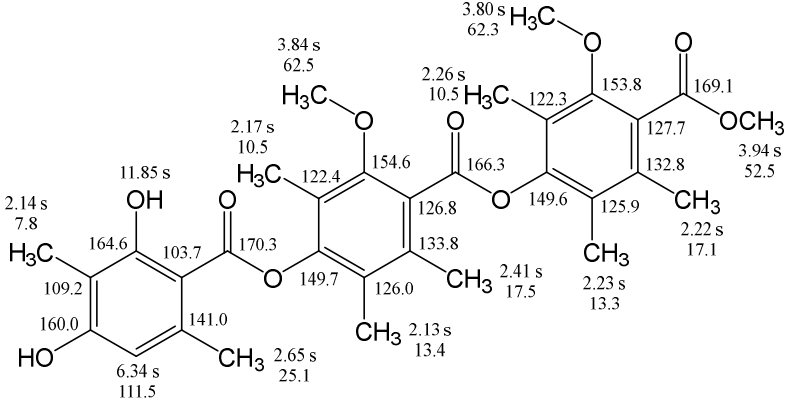 <p><sup>1</sup>H and <sup>13</sup>C NMR (500 and 125 MHz, CDCl<sub>3</sub>) [48].</p>                                                                                                               | <p>APPIHRMS: <i>m/z</i> 581.2378, [M+H]<sup>+</sup>, (calcd for 581.2387, C<sub>32</sub>H<sub>36</sub>O<sub>10</sub>); <sup>1</sup>H and <sup>13</sup>C NMR (500 and 125 MHz, CDCl<sub>3</sub>) [48].</p>                                                                                                                                                                                      |
| <p><b>Thielavin C (51)</b></p>                                                                                                                                                                       |                                                                                                                                                                                                                                                                                                                                                                                                |
| <p><b>Thielavins D (52)*</b><br/>Colorless powder; mp 235–238°C; SI-MS: <i>m/z</i> 553 (C<sub>30</sub>H<sub>32</sub>O<sub>10</sub>); UV (MeOH) λ<sub>max</sub> (ε): 269.5 (23,110), 303.3 (7,590) nm; UV (dil HCl-MeOH) λ<sub>max</sub> (ε): 270 (23,050), 302 (46,417) nm [70].</p>   |                                                                                                                                                                                                                                                                                                                                                                                                |
| <p><b>Thielavins E (53)*</b><br/>Colorless powder; mp 217–220°C; SI-MS: <i>m/z</i> 553 (C<sub>30</sub>H<sub>32</sub>O<sub>10</sub>); UV (MeOH) λ<sub>max</sub> (ε): 275.9 (26,236), 305 (5,935) nm; UV (dil HCl-MeOH) λ<sub>max</sub> (ε): 276.1 (24,679), 314.5 (43,205) nm [70].</p> |                                                                                                                                                                                                                                                                                                                                                                                                |
| <p><b>Thielavin F (54)</b></p>  <p><sup>1</sup>H and <sup>13</sup>C NMR (C<sub>5</sub>D<sub>5</sub>N).</p>                                                                                         | <p>UV (MeOH) λ<sub>max</sub>: 210, 276, 310 nm; IR (KBr) γ<sub>max</sub>: 3400, 2937, 1743, 1652, 1604, 1461 cm<sup>-1</sup>; HRF-ABMS: <i>m/z</i> 551.1928 [M-H]<sup>-</sup> (calcd for C<sub>30</sub>H<sub>32</sub>O<sub>10</sub>, 551.1917); LRFABMS: <i>m/z</i> 553, 535, 389, 357, 343, 193, 179, 165, 151; <sup>1</sup>H and <sup>13</sup>C NMR (C<sub>5</sub>D<sub>5</sub>N) [121].</p> |



|                                                                                                                                                                    |                                                                                                                                                                                                                                                                                                                                                                                              |
|--------------------------------------------------------------------------------------------------------------------------------------------------------------------|----------------------------------------------------------------------------------------------------------------------------------------------------------------------------------------------------------------------------------------------------------------------------------------------------------------------------------------------------------------------------------------------|
| 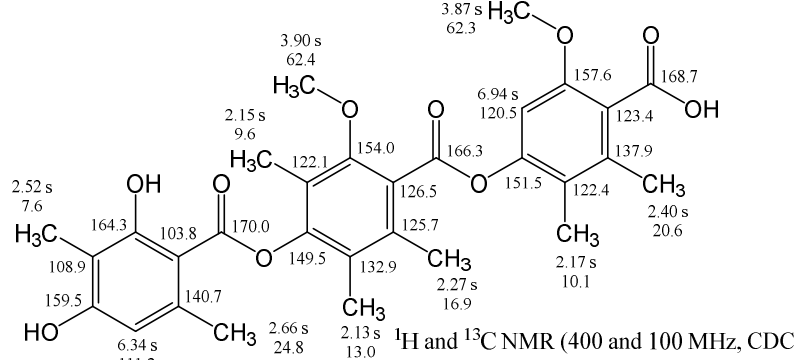 <p><sup>1</sup>H and <sup>13</sup>C NMR (400 and 100 MHz, CDCl<sub>3</sub>)</p> | <p>Pale yellow amorphous powder; ESIMS: <i>m/z</i> 575.7 [M+Na]<sup>+</sup>, 551.7 [M-H]<sup>-</sup>; <sup>1</sup>H and <sup>13</sup>C NMR (400 and 100 MHz, CDCl<sub>3</sub>) [68].</p>                                                                                                                                                                                                     |
| <p><b>Thielavin G (55)</b></p>                                                                                                                                     |                                                                                                                                                                                                                                                                                                                                                                                              |
|                                                                                 | <p>UV (MeOH) λ<sub>max</sub> 210, 276, 310 nm; IR (KBr) γ<sub>max</sub>: 3400, 2941, 1743, 1651, 1419, 1269 cm<sup>-1</sup>; HRFABMS: <i>m/z</i> 551.1912 [M-H]<sup>-</sup> (calcd for C<sub>30</sub>H<sub>32</sub>O<sub>10</sub>, 551.1918); LRFABMS: <i>m/z</i> 553, 535, 461, 389, 343, 329, 193, 179, 165; <sup>1</sup>H and <sup>13</sup>C NMR (C<sub>5</sub>D<sub>5</sub>N) [121].</p> |
| <p><b>Thielavin H (56)</b></p>                                                                                                                                     |                                                                                                                                                                                                                                                                                                                                                                                              |
|                                                                                | <p>UV (MeOH) λ<sub>max</sub>: 215, 267, 308 nm; IR (KBr) γ<sub>max</sub>: 3400, 2929, 1660, 1446, 1315, 1255 cm<sup>-1</sup>; HRFABMS: <i>m/z</i> 523.1601 [M-H]<sup>-</sup> (calcd for C<sub>28</sub>H<sub>30</sub>O<sub>10</sub>, 523.1604); LRFABMS: <i>m/z</i> 525, 375, 329, 179, 151; <sup>1</sup>H and <sup>13</sup>C NMR (C<sub>5</sub>D<sub>5</sub>N) [121].</p>                    |
| <p><b>Thielavin I (57)</b></p>                                                                                                                                     |                                                                                                                                                                                                                                                                                                                                                                                              |
|                                                                                | <p>UV (MeOH) λ<sub>max</sub>: 218, 275, 310 nm; IR (KBr) γ<sub>max</sub>: 3398, 2931, 1660, 1622, 1417, 1307 cm<sup>-1</sup>; HRFABMS: <i>m/z</i> 493.1862 [M-H]<sup>-</sup> (calcd for C<sub>28</sub>H<sub>30</sub>O<sub>8</sub>, 493.1862); LRFABMS: <i>m/z</i> 495, 343, 331, 231, 179, 165; <sup>1</sup>H and <sup>13</sup>C NMR (C<sub>5</sub>D<sub>5</sub>N) [121].</p>                |
| <p><b>Thielavin J (58)</b></p>                                                                                                                                     |                                                                                                                                                                                                                                                                                                                                                                                              |

|                                                                                                       |                                                                                                                                                                                                                                                                                                                                                                                                                      |
|-------------------------------------------------------------------------------------------------------|----------------------------------------------------------------------------------------------------------------------------------------------------------------------------------------------------------------------------------------------------------------------------------------------------------------------------------------------------------------------------------------------------------------------|
| <p><sup>1</sup>H and <sup>13</sup>C NMR (C<sub>5</sub>D<sub>5</sub>N)</p>                             | <p>UV (MeOH) <math>\lambda_{max}</math>: 214, 250, 275, 306 nm; IR (KBr) <math>\gamma_{max}</math>: 3400, 2933, 1654, 1622, 1456, 1265 cm<sup>-1</sup>; HRFABMS: <math>m/z</math> 537.1750 [M-H]<sup>-</sup> (calcd for C<sub>29</sub>H<sub>30</sub>O<sub>10</sub>, 537.1760); LRFABMS: <math>m/z</math> 539, 375, 357, 343, 193, 165; <sup>1</sup>H and <sup>13</sup>C NMR (C<sub>5</sub>D<sub>5</sub>N) [121].</p> |
| <p><sup>1</sup>H and <sup>13</sup>C NMR (500 and 125 MHz, CDCl<sub>3</sub>/CD<sub>3</sub>OD, 7:3)</p> | <p>White solid; UV (MeOH) <math>\lambda_{max}</math>: 272, 308; IR <math>\gamma_{max}</math>: 3408, 2942, 1725, 1653, 1605 cm<sup>-1</sup>; HRESIMS: <math>m/z</math> 539.19026 [M+H]<sup>+</sup> (calcd. for C<sub>29</sub>H<sub>31</sub>O<sub>10</sub>, 539.1911); <sup>1</sup>H and <sup>13</sup>C NMR (500 and 125 MHz, CDCl<sub>3</sub>/CD<sub>3</sub>OD, 7:3) [67].</p>                                        |
| <b>Thielavin K (59)</b>                                                                               |                                                                                                                                                                                                                                                                                                                                                                                                                      |
| <p><sup>1</sup>H and <sup>13</sup>C NMR (C<sub>5</sub>D<sub>5</sub>N)</p>                             | <p>UV (MeOH) <math>\lambda_{max}</math>: 215, 250, 274, 307 nm; IR (KBr) <math>\gamma_{max}</math>: 3400, 2935, 1726, 1620, 1417, 1265 cm<sup>-1</sup>; HRFABM: <math>m/z</math> 551.1901 [M-H]<sup>-</sup> (calcd for C<sub>29</sub>H<sub>30</sub>O<sub>10</sub>, 551.1918); LRFABMS: <math>m/z</math> 553, 509, 389, 357, 193, 165; <sup>1</sup>H and <sup>13</sup>C NMR (C<sub>5</sub>D<sub>5</sub>N) [121].</p>  |
| <p><sup>1</sup>H and <sup>13</sup>C NMR (500 and 125 MHz, CDCl<sub>3</sub>/CD<sub>3</sub>OD, 7:3)</p> | <p>White solid; UV (MeOH) <math>\lambda_{max}</math>: 271, 310 nm; IR (Reflectance) <math>\gamma_{max}</math>: 3405, 2932, 1728, 1653, 1618 cm<sup>-1</sup>; HRESIMS: <math>m/z</math> 553.2060 [M+H]<sup>+</sup> (calcd. for C<sub>29</sub>H<sub>31</sub>O<sub>10</sub>, 553.2068); <sup>1</sup>H and <sup>13</sup>C NMR (500 and 125 MHz, CDCl<sub>3</sub>/CD<sub>3</sub>OD, 7:3) [67].</p>                        |
| <b>Thielavin L (60)</b>                                                                               |                                                                                                                                                                                                                                                                                                                                                                                                                      |

|                                                                                                                                                                                                                                                                                                                                                                                                                                                                                                                                                                                                                                 |                                                                                                                                                                                                                                                                                                                                                                                                           |
|---------------------------------------------------------------------------------------------------------------------------------------------------------------------------------------------------------------------------------------------------------------------------------------------------------------------------------------------------------------------------------------------------------------------------------------------------------------------------------------------------------------------------------------------------------------------------------------------------------------------------------|-----------------------------------------------------------------------------------------------------------------------------------------------------------------------------------------------------------------------------------------------------------------------------------------------------------------------------------------------------------------------------------------------------------|
| <p>Chemical structure of Thielavin M (61) is shown with <sup>13</sup>C NMR chemical shifts and peak assignments. The structure is a complex polycyclic molecule with multiple methoxy and methyl groups. The shifts are: 2.38 s, 8.7, 110.3, 165.0, 163.2, 6.64 s, 112.4, 103.1, 170.1, 2.09 s, 10.3, 122.7, 154.8, 127.1, 133.9, 126.4, 1.94 s, 13.1, 2.23 s, 17.3, 2.39 s, 10.7, 117.5, 155.1, 166.5, 151.2, 121.5, 118.7, 135.3, 170.3, 4.83 dd (11.1, 4.3), 4.72 dd (11.1, 5.9), 4.40, m, 4.03 d (5.9), 2.26 s, 17.9, 2.12 s, 13.1.</p>                                                                                     | <p>UV (MeOH) <math>\lambda_{max}</math>: 214, 275, 310 nm; IR (KBr) <math>\gamma_{max}</math>: 3398, 2933, 1733, 1654, 1606, 1458 cm<sup>-1</sup>; HRFABMS: <i>m</i>: 625.2280 [M-H]<sup>-</sup> (calcd for C<sub>33</sub>H<sub>38</sub>O<sub>12</sub>, 625.2285); LRFABMS: <i>m/z</i> 627, 535, 463, 357, 193, 165; <sup>1</sup>H and <sup>13</sup>C NMR (C<sub>5</sub>D<sub>5</sub>N) [121].</p>        |
| <p><b>Thielavin M (61)</b></p> <p>Chemical structure of Thielavin N (62) is shown with <sup>13</sup>C NMR chemical shifts and peak assignments. The structure is a complex polycyclic molecule with multiple methoxy and methyl groups. The shifts are: 3.71 s, 62.3, 2.14 s, 10.4, 122.7, 154.9, 127.2, 133.9, 126.4, 2.00 s, 13.1, 2.25 s, 17.3, 2.44 s, 10.4, 116.6, 159.7, 175.6, 115.1, 138.1, 120.7, 2.62 s, 18.7, 2.23 s, 13.4, 166.5, 151.9, 149.4, 169.6, 104.9, 166.1, 6.71 d (2.3), 8102.2, 165.0, 6.64 d (2.3), 113.2, 144.0, 2.55 s, 24.4.</p>                                                                     | <p>UV (MeOH) <math>\lambda_{max}</math>: 214, 275, 310 nm; IR (KBr) <math>\gamma_{max}</math>: 3400, 2929, 1733, 1652, 1624, 1458 cm<sup>-1</sup>; HRFABMS: <i>m/z</i> 537.1766 [M-H]<sup>+</sup> (calcd for C<sub>29</sub>H<sub>30</sub>O<sub>10</sub>, 537.1760); LRFAB-MS: <i>m/z</i> 539, 389, 343, 193, 151; <sup>1</sup>H and <sup>13</sup>C NMR (C<sub>5</sub>D<sub>5</sub>N) [121].</p>           |
| <p><b>Thielavin N (62)</b></p> <p>Chemical structure of Thielavin O (63) is shown with <sup>13</sup>C NMR chemical shifts and peak assignments. The structure is a complex polycyclic molecule with multiple methoxy and methyl groups. The shifts are: 3.67 s, 56.1, 2.45 s, 10.7, 116.7, 160.1, 166.5, 151.2, 120.8, 138.3, 2.65 s, 18.9, 2.22 s, 13.6, 6.94 s, 104.9, 156.2, 171.2, 112.9, 137.6, 122.5, 2.29 s, 17.7, 2.93 s, 12.6, 2.37 s, 8.9, 110.3, 164.9, 103.8, 171.2, 140.9, 163.1, 6.62 s, 112.4, 2.55 s, 24.9.</p>                                                                                                 | <p>UV (MeOH) <math>\lambda_{max}</math>: 214, 253, 275, 318 nm; IR (KBr) <math>\gamma_{max}</math>: 3421, 2933, 1743, 1654, 1604, 1419 cm<sup>-1</sup>; HRFABMS: <i>m/z</i> 537.1773 [M-H]<sup>+</sup> (calcd for C<sub>29</sub>H<sub>30</sub>O<sub>10</sub>, 537.1761); LRFAB-MS: <i>m/z</i> 539, 461, 318, 179, 165; <sup>1</sup>H and <sup>13</sup>C NMR (C<sub>5</sub>D<sub>5</sub>N) [121].</p>      |
| <p><b>Thielavin O (63)</b></p> <p>Chemical structure of Thielavin P (64) is shown with <sup>13</sup>C NMR chemical shifts and peak assignments. The structure is a complex polycyclic molecule with multiple methoxy and methyl groups. The shifts are: 3.72 s, 62.5, 2.17 s, 10.6, 122.9, 155.1, 127.4, 134.1, 126.7, 2.26 s, 17.5, 2.02 s, 13.4, 2.61 s, 19.6, 2.42 s, 10.1, 110.4, 161.2, 106.0, 170.9, 150.7, 160.8, 118.2, 137.7, 118.2, 2.30 s, 13.2, 2.24 s, 13.6, 152.1, 120.9, 138.3, 115.3, 159.9, 175.8, 2.63 s, 18.9, 2.24 s, 13.6, 116.9, 159.9, 175.8, 115.3, 138.3, 120.9, 152.1, 166.7, 10.7, 2.45 s, 10.7.</p> | <p>UV (MeOH) <math>\lambda_{max}</math>: 214, 252, 275, 318 nm; IR (KBr) <math>\gamma_{max}</math>: 3421, 2929, 1733, 1652, 1651, 1610, 1458 cm<sup>-1</sup>; HRFABMS: <i>m/z</i> 565.2078 [M-H]<sup>+</sup> (calcd for C<sub>31</sub>H<sub>34</sub>O<sub>10</sub>, 565.2073); LRFABMS: <i>m/z</i> 539, 389, 343, 193, 151; <sup>1</sup>H and <sup>13</sup>C NMR (C<sub>5</sub>D<sub>5</sub>N) [121].</p> |

|                                                                                                                     |                                                                                                                                                                                                                                                                                                                                                                                                                                                                                                                                   |
|---------------------------------------------------------------------------------------------------------------------|-----------------------------------------------------------------------------------------------------------------------------------------------------------------------------------------------------------------------------------------------------------------------------------------------------------------------------------------------------------------------------------------------------------------------------------------------------------------------------------------------------------------------------------|
| <p><b>Thielavin P (64)</b></p> 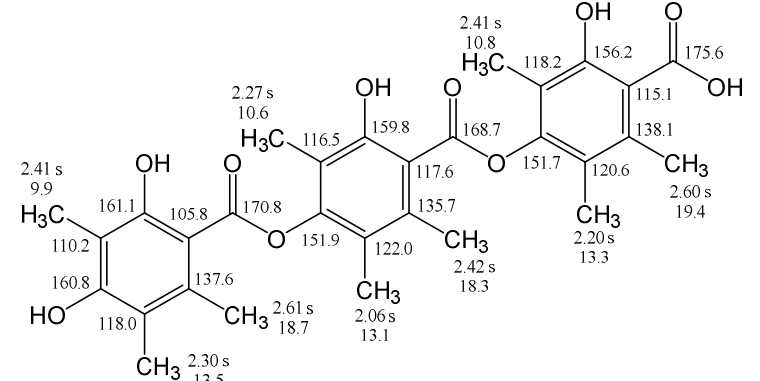   | <p>UV (MeOH) <math>\lambda_{\max}</math>: 216, 258, 273, 318 nm; IR (KBr) <math>\gamma_{\max}</math>: 3400, 2927, 1652, 1612, 1456, 1419 <math>\text{cm}^{-1}</math>; HRFABMS: <math>m/z</math> 551.1929 <math>[\text{M-H}]^-</math> (calcd for <math>\text{C}_{30}\text{H}_{32}\text{O}_{10}</math>, 551.1918); LRFABMS: <math>m/z</math> 553, 344, 193, 179; <math>^1\text{H}</math> and <math>^{13}\text{C}</math> NMR (<math>\text{C}_5\text{D}_5\text{N}</math>) [121].</p>                                                  |
| <p><b>Thielavin Q (65)</b></p>   | <p>White amorphous powder; <math>[\alpha]_D^{25} +6.3</math> (c 0.1, MeOH); UV (MeOH) <math>\lambda_{\max}</math> (log <math>\epsilon</math>): 288 (3.31) nm; IR (KBr) <math>\gamma_{\max}</math>: 3426, 1734, 1666, 1402, 1376, 1172, 1075 <math>\text{cm}^{-1}</math>; HRESIMS: <math>m/z</math> 565.2075 <math>[\text{M-H}]^-</math> (calcd for <math>\text{C}_{31}\text{H}_{34}\text{O}_{10}</math>, 565.2074); <math>^1\text{H}</math> and <math>^{13}\text{C}</math> NMR (900 and 225 <math>\text{CDCl}_3</math>) [68].</p> |
| <p><b>Thielavin S (66)</b></p>  | <p>White powder; UV (MeOH) <math>\lambda_{\max}</math>: 222, 272, 313 nm; HRESIMS: <math>m/z</math> 451.1394 <math>[\text{M-H}]^-</math> (calcd for <math>\text{C}_{25}\text{H}_{23}\text{O}_8</math>, 451.1393); <math>^1\text{H}</math> NMR and <math>^{13}\text{C}</math> NMR (500 and 125 MHz, <math>\text{CD}_3\text{OD}</math>) [19].</p>                                                                                                                                                                                   |
| <p><b>Thielavin T (67)</b></p>  | <p>White powder; UV (MeOH) <math>\lambda_{\max}</math>: 225, 272, 308 nm; HRESIMS: <math>m/z</math> 465.1544 <math>[\text{M-H}]^-</math> (calcd for <math>\text{C}_{26}\text{H}_{25}\text{O}_8</math>, 465.1549); <math>^1\text{H}</math> NMR and <math>^{13}\text{C}</math> NMR (400 and 100 MHz, <math>\text{CD}_3\text{OD}</math>) [19].</p>                                                                                                                                                                                   |
| <p><b>Thielavin U (68)</b></p>                                                                                      |                                                                                                                                                                                                                                                                                                                                                                                                                                                                                                                                   |

|                                                                                                                                                                                                                                                                                                                                                                                                                                                                                                                                       |                                                                                                                                                                                                                                                                                                       |
|---------------------------------------------------------------------------------------------------------------------------------------------------------------------------------------------------------------------------------------------------------------------------------------------------------------------------------------------------------------------------------------------------------------------------------------------------------------------------------------------------------------------------------------|-------------------------------------------------------------------------------------------------------------------------------------------------------------------------------------------------------------------------------------------------------------------------------------------------------|
| 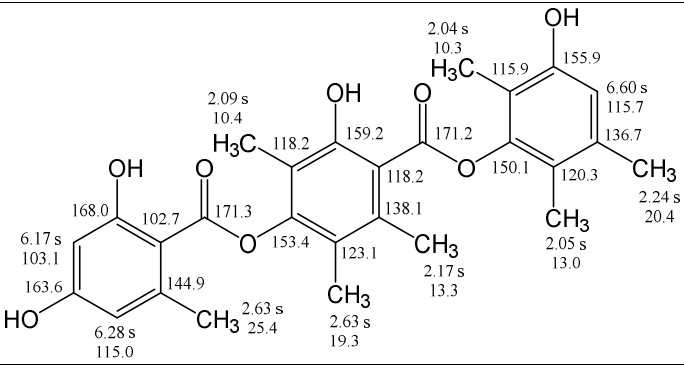 <p><sup>13</sup>C NMR (200 MHz, CD<sub>3</sub>OD): 168.0, 163.6, 103.1, 102.7, 144.9, 171.3, 153.4, 118.2, 159.2, 118.2, 138.1, 123.1, 123.1, 2.63 s, 25.4, 2.63 s, 19.3, 2.17 s, 13.3, 2.04 s, 10.3, 115.9, 155.9, 150.1, 120.3, 136.7, 6.60 s, 115.7, 2.24 s, 20.4, 2.05 s, 13.0.</p> <p><sup>1</sup>H NMR (400 MHz, CD<sub>3</sub>OD): 6.17 s, 6.28 s, 115.0.</p>                                                                                | <p>White powder; UV (MeOH) <math>\lambda_{max}</math>: 218, 272, 310 nm; RESIMS: <math>m/z</math> 479.1707 [M-H]<sup>-</sup> (calcd for C<sub>27</sub>H<sub>27</sub>O<sub>8</sub>, 479.1706); <sup>1</sup>H NMR and <sup>13</sup>C NMR (800 and 200 MHz, CD<sub>3</sub>OD) [19].</p>                  |
| <p><b>Thielavin V (69)</b></p>  <p><sup>13</sup>C NMR (200 MHz, CD<sub>3</sub>OD): 2.63 s, 25.2, 110.6, 163.4, 165.6, 103.5, 171.6, 152.4, 117.8, 157.1, 117.0, 136.8, 122.6, 2.54 s, 18.5, 2.05 s, 9.5, 2.10 s, 13.2, 2.05 s, 8.1, 115.7, 157.8, 170.8, 151.3, 137.9, 6.50 s, 114.6, 6.58 s, 114.5, 2.27 s, 21.3.</p> <p><sup>1</sup>H NMR (400 MHz, CD<sub>3</sub>OD): 2.63 s, 25.2, 6.36 s, 112.7, 2.05 s, 9.5.</p>                               | <p>White powder; UV (MeOH) <math>\lambda_{max}</math>: 224, 276, 313 nm; HRESIMS: <math>m/z</math> 479.1708 [M-H]<sup>-</sup> (calcd for C<sub>27</sub>H<sub>27</sub>O<sub>8</sub>, 479.1706); <sup>1</sup>H NMR and <sup>13</sup>C NMR (400 and 100 MHz, CD<sub>3</sub>OD) [19].</p>                 |
| <p><b>Thielavin W (70)</b></p>  <p><sup>13</sup>C NMR (500 MHz, DMSO-<i>d</i><sub>6</sub>): 161.4, 160.8, 100.6, 141.0, 107.6, 166.7, 149.1, 116.5, 150.7, 131.8, 121.6, 120.8, 2.40 s, 21.8, 2.06 s, 12.5, 2.29 s, 16.7, 1.88 s, 9.4, 114.2, 165.4, 170.0, 138.7, 114.7, 6.18 s, 110.3, 2.52 s, 23.1.</p> <p><sup>1</sup>H NMR (500 MHz, DMSO-<i>d</i><sub>6</sub>): 6.26 s, 110.3, 2.06 s, 10.2, 2.06 s, 10.2.</p>                               | <p>White powder, UV (CAN) <math>\lambda_{max}</math>: 218.1, 267.8, 304.2 nm; HRESIMS: <math>m/z</math> 511.1604 [M+H]<sup>+</sup> (calcd. for C<sub>27</sub>H<sub>27</sub>O<sub>10</sub>, 511.1599); <sup>1</sup>H NMR and <sup>13</sup>C NMR (500 and 125 MHz, DMSO-<i>d</i><sub>6</sub>) [52].</p> |
| <p><b>Thielavin X (71)</b></p>  <p><sup>13</sup>C NMR (500 MHz, DMSO-<i>d</i><sub>6</sub>): 161.4, 160.6, 100.6, 141.0, 107.2, 166.7, 149.5, 121.8, 153.2, 132.2, 126.2, 125.8, 2.54 s, 21.8, 2.12 s, 12.7, 2.31 s, 16.6, 3.78 s, 62.0, 2.13 s, 10.0, 1.99 s, 9.0, 114.3, 164.8, 170.7, 139.0, 115.5, 6.21 s, 111.2, 2.40 s, 23.0.</p> <p><sup>1</sup>H NMR (500 MHz, DMSO-<i>d</i><sub>6</sub>): 6.27 s, 110.2, 2.27 s, 100.6, 6.27 s, 110.2.</p> | <p>White powder, UV (CAN) <math>\lambda_{max}</math>: 218.1, 267.8, 306.5 nm; HRESIMS: <math>m/z</math> 525.1727 [M+H]<sup>+</sup> (calcd for C<sub>28</sub>H<sub>29</sub>O<sub>10</sub>, 525.1755); <sup>1</sup>H NMR and <sup>13</sup>C NMR (500 and 125 MHz, DMSO-<i>d</i><sub>6</sub>) [52].</p>  |
| <p><b>Thielavin Y (72)</b></p>                                                                                                                                                                                                                                                                                                                                                                                                                                                                                                        |                                                                                                                                                                                                                                                                                                       |

|                                                                                                                                                                                                                                                                                                                                                                                                                                                                                                                                                                                                                                                                                                                   |                                                                                                                                                                                                                                                                                                                                               |
|-------------------------------------------------------------------------------------------------------------------------------------------------------------------------------------------------------------------------------------------------------------------------------------------------------------------------------------------------------------------------------------------------------------------------------------------------------------------------------------------------------------------------------------------------------------------------------------------------------------------------------------------------------------------------------------------------------------------|-----------------------------------------------------------------------------------------------------------------------------------------------------------------------------------------------------------------------------------------------------------------------------------------------------------------------------------------------|
| 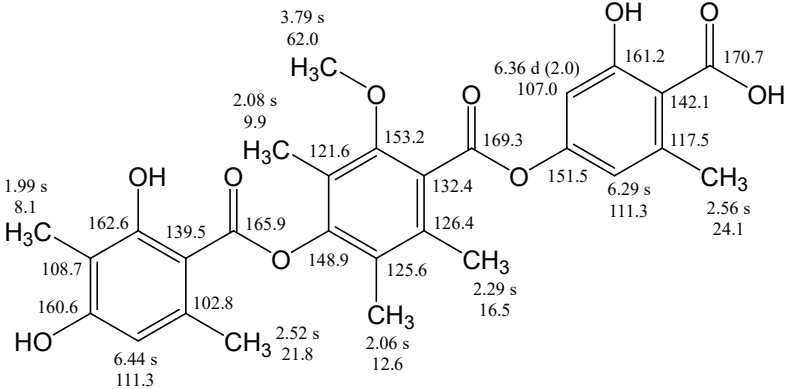 <p><sup>13</sup>C NMR (500 MHz, DMSO-<i>d</i><sub>6</sub>): 162.6, 139.5, 165.9, 121.6, 153.2, 132.4, 126.4, 125.6, 148.9, 102.8, 108.7, 160.6, 111.3, 6.44 s, 2.52 s, 2.06 s, 2.29 s, 16.5, 12.6, 2.08 s, 9.9, 3.79 s, 62.0, 107.0, 151.5, 111.3, 6.29 s, 117.5, 142.1, 161.2, 170.7, 2.56 s, 24.1.</p>                                                                                                                                                                                                                                                                                                                       | <p>White powder; UV (CAN) <math>\lambda_{max}</math>: 218.1, 276.1, 304.7 nm; HRESIMS: <math>m/z</math> 525.1765 [M+H]<sup>+</sup> (calcd. for C<sub>28</sub>H<sub>29</sub>O<sub>10</sub>, 525.1755); <sup>1</sup>H NMR and <sup>13</sup>C NMR (500 and 125 MHz, DMSO-<i>d</i><sub>6</sub>) [52].</p>                                         |
| <p><b>Thielavin Z (73)</b></p>  <p><sup>13</sup>C NMR (500 MHz, DMSO-<i>d</i><sub>6</sub>): 162.2, 139.3, 165.7, 154.5, 135.5, 121.7, 121.2, 103.5, 160.9, 114.4, 111.3, 6.14 s, 2.52 s, 2.03 s, 2.32 s, 16.8, 7.01 s, 104.2, 149.9, 121.7, 154.5, 169.7, 114.4, 165.1, 138.7, 115.3, 6.41 s, 111.3, 2.56 s, 23.8, 1.98 s, 8.1, 3.82 s, 56.3, 1.96 s, 9.1, 114.4, 160.9, 103.5, 139.3, 165.7, 154.5, 135.5, 121.7, 121.2, 103.5, 160.9, 114.4, 111.3, 6.14 s, 2.52 s, 2.03 s, 2.32 s, 16.8, 7.01 s, 104.2, 149.9, 121.7, 154.5, 169.7, 114.4, 165.1, 138.7, 115.3, 6.41 s, 111.3, 2.56 s, 23.8, 1.98 s, 8.1, 3.82 s, 56.3.</p> | <p>White powder; UV (CAN) <math>\lambda_{max}</math>: 218.1, 276.1, 306.5 nm; HRESIMS: <math>m/z</math> 525.1757 [M+H]<sup>+</sup> (calcd for C<sub>28</sub>H<sub>29</sub>O<sub>10</sub>, 525.1755); <sup>1</sup>H NMR and <sup>13</sup>C NMR (500 and 125 MHz, DMSO-<i>d</i><sub>6</sub>) [52].</p>                                          |
| <p><b>Thielavin Z1 (74)</b></p>  <p><sup>13</sup>C NMR (500 MHz, DMSO-<i>d</i><sub>6</sub>): 162.0, 139.1, 165.1, 156.2, 134.3, 125.7, 120.1, 103.6, 160.9, 108.6, 111.1, 6.40 s, 2.52 s, 2.40 s, 18.7, 7.10 s, 120.1, 150.6, 122.0, 156.2, 169.4, 115.4, 156.2, 139.1, 114.1, 6.40 s, 113.2, 2.52 s, 23.6, 2.03 s, 9.1, 3.82 s, 61.9, 2.11 s, 9.6, 1.98 s, 8.1, 162.0, 139.1, 165.1, 156.2, 134.3, 125.7, 120.1, 103.6, 160.9, 108.6, 111.1, 6.40 s, 2.52 s, 2.40 s, 18.7, 7.10 s, 120.1, 150.6, 122.0, 156.2, 169.4, 115.4, 156.2, 139.1, 114.1, 6.40 s, 113.2, 2.52 s, 23.6, 2.03 s, 9.1, 3.82 s, 61.9, 2.11 s, 9.6.</p>   | <p>White powder; UV (CAN) <math>\lambda_{max}</math>: 218.1, 276.1, 306.9 nm; <sup>1</sup>H NMR and <sup>13</sup>C NMR (500 and 125 MHz, DMSO-<i>d</i><sub>6</sub>); HRESIMS: <math>m/z</math> 525.1747 [M+H]<sup>+</sup> (calcd for C<sub>28</sub>H<sub>29</sub>O<sub>10</sub>, 525.1755) [52].</p>                                          |
| <p><b>Thielavin Z2 (75)</b></p>  <p><sup>13</sup>C NMR (500 MHz, DMSO-<i>d</i><sub>6</sub>): 162.0, 139.1, 165.0, 156.2, 134.8, 125.4, 120.4, 103.7, 160.9, 108.6, 111.0, 6.41 s, 2.53 s, 2.40 s, 19.2, 7.12 s, 120.4, 149.3, 122.3, 156.2, 169.4, 115.4, 156.7, 139.1, 120.4, 118.6, 2.10 s, 12.6, 2.08 s, 9.9, 3.79 s, 61.9, 2.13 s, 9.6, 1.98 s, 8.1, 162.0, 139.1, 165.0, 156.2, 134.8, 125.4, 120.4, 103.7, 160.9, 108.6, 111.0, 6.41 s, 2.53 s, 2.40 s, 19.2, 7.12 s, 120.4, 149.3, 122.3, 156.2, 169.4, 115.4, 156.7, 139.1, 120.4, 118.6, 2.10 s, 12.6, 2.08 s, 9.9, 3.79 s, 61.9, 2.13 s, 9.6.</p>                   | <p>White powder, UV ACN <math>\lambda_{max}</math>: 218.1, 267.8, 305.2 nm; <sup>1</sup>H NMR and <sup>13</sup>C NMR (500 and 125 MHz, DMSO-<i>d</i><sub>6</sub>); HRESIMS <math>m/z</math>: 539.1916 [M+H]<sup>+</sup> (calcd. for C<sub>29</sub>H<sub>31</sub>O<sub>10</sub>, 539.1912); ISCID: 507.1, 375.2, 343.1, 179.1, 165.1 [52].</p> |

|                                                                                                                                                                                                                                                                                                                                                                                                                                                                                                                                                                                                                                                                                                                                                                                                                                                                                                                                                                                                                                                                                                                                                                                                                                                                                                                                                                                                                                                                                                                                                                                                                                                                                                                                                                                                                                                                                                                                                                                                                                                                                                                                                                                                                                                                                                                                                                                                                                                                                                                                                                                                                                                                                                                                                                                                                                                                                                                                                                                                                                                                                                                                                                                                                                                                                                                                                                                                                                                                                                                                                                                                                                                                                                                                                                                                                                                                                                                                                                                                                                                                                                                                                                                                                                                                                                                                                                                                                                                                                                                                                                                                        |
|--------------------------------------------------------------------------------------------------------------------------------------------------------------------------------------------------------------------------------------------------------------------------------------------------------------------------------------------------------------------------------------------------------------------------------------------------------------------------------------------------------------------------------------------------------------------------------------------------------------------------------------------------------------------------------------------------------------------------------------------------------------------------------------------------------------------------------------------------------------------------------------------------------------------------------------------------------------------------------------------------------------------------------------------------------------------------------------------------------------------------------------------------------------------------------------------------------------------------------------------------------------------------------------------------------------------------------------------------------------------------------------------------------------------------------------------------------------------------------------------------------------------------------------------------------------------------------------------------------------------------------------------------------------------------------------------------------------------------------------------------------------------------------------------------------------------------------------------------------------------------------------------------------------------------------------------------------------------------------------------------------------------------------------------------------------------------------------------------------------------------------------------------------------------------------------------------------------------------------------------------------------------------------------------------------------------------------------------------------------------------------------------------------------------------------------------------------------------------------------------------------------------------------------------------------------------------------------------------------------------------------------------------------------------------------------------------------------------------------------------------------------------------------------------------------------------------------------------------------------------------------------------------------------------------------------------------------------------------------------------------------------------------------------------------------------------------------------------------------------------------------------------------------------------------------------------------------------------------------------------------------------------------------------------------------------------------------------------------------------------------------------------------------------------------------------------------------------------------------------------------------------------------------------------------------------------------------------------------------------------------------------------------------------------------------------------------------------------------------------------------------------------------------------------------------------------------------------------------------------------------------------------------------------------------------------------------------------------------------------------------------------------------------------------------------------------------------------------------------------------------------------------------------------------------------------------------------------------------------------------------------------------------------------------------------------------------------------------------------------------------------------------------------------------------------------------------------------------------------------------------------------------------------------------------------------------------------------------------------|
| <p><b>Thielavin Z<sub>3</sub> (76)</b></p> 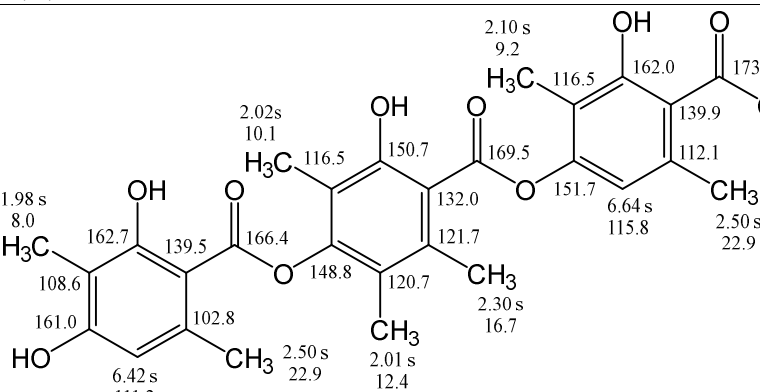 <p>Chemical structure of Thielavin Z<sub>3</sub> (76) is shown with <sup>13</sup>C NMR and <sup>1</sup>H NMR data. The structure is a dimeric flavonoid with two central carbonyl groups. The left ring has a methyl group at C-2, a hydroxyl group at C-3, and a methoxy group at C-4. The right ring has a methyl group at C-2, a hydroxyl group at C-3, and a methoxy group at C-4. The central carbonyl groups are at C-5 and C-5'. The <sup>13</sup>C NMR data (ppm) are: 162.7, 139.5, 166.4, 148.8, 150.7, 132.0, 121.7, 120.7, 116.5, 115.8, 112.1, 139.9, 162.0, 173.0, 161.0, 108.6, 102.8, 111.2, 101.0, 100.7, 100.5, 100.3, 100.1, 100.0, 99.9, 99.8, 99.7, 99.6, 99.5, 99.4, 99.3, 99.2, 99.1, 99.0, 98.9, 98.8, 98.7, 98.6, 98.5, 98.4, 98.3, 98.2, 98.1, 98.0, 97.9, 97.8, 97.7, 97.6, 97.5, 97.4, 97.3, 97.2, 97.1, 97.0, 96.9, 96.8, 96.7, 96.6, 96.5, 96.4, 96.3, 96.2, 96.1, 96.0, 95.9, 95.8, 95.7, 95.6, 95.5, 95.4, 95.3, 95.2, 95.1, 95.0, 94.9, 94.8, 94.7, 94.6, 94.5, 94.4, 94.3, 94.2, 94.1, 94.0, 93.9, 93.8, 93.7, 93.6, 93.5, 93.4, 93.3, 93.2, 93.1, 93.0, 92.9, 92.8, 92.7, 92.6, 92.5, 92.4, 92.3, 92.2, 92.1, 92.0, 91.9, 91.8, 91.7, 91.6, 91.5, 91.4, 91.3, 91.2, 91.1, 91.0, 90.9, 90.8, 90.7, 90.6, 90.5, 90.4, 90.3, 90.2, 90.1, 90.0, 89.9, 89.8, 89.7, 89.6, 89.5, 89.4, 89.3, 89.2, 89.1, 89.0, 88.9, 88.8, 88.7, 88.6, 88.5, 88.4, 88.3, 88.2, 88.1, 88.0, 87.9, 87.8, 87.7, 87.6, 87.5, 87.4, 87.3, 87.2, 87.1, 87.0, 86.9, 86.8, 86.7, 86.6, 86.5, 86.4, 86.3, 86.2, 86.1, 86.0, 85.9, 85.8, 85.7, 85.6, 85.5, 85.4, 85.3, 85.2, 85.1, 85.0, 84.9, 84.8, 84.7, 84.6, 84.5, 84.4, 84.3, 84.2, 84.1, 84.0, 83.9, 83.8, 83.7, 83.6, 83.5, 83.4, 83.3, 83.2, 83.1, 83.0, 82.9, 82.8, 82.7, 82.6, 82.5, 82.4, 82.3, 82.2, 82.1, 82.0, 81.9, 81.8, 81.7, 81.6, 81.5, 81.4, 81.3, 81.2, 81.1, 81.0, 80.9, 80.8, 80.7, 80.6, 80.5, 80.4, 80.3, 80.2, 80.1, 80.0, 79.9, 79.8, 79.7, 79.6, 79.5, 79.4, 79.3, 79.2, 79.1, 79.0, 78.9, 78.8, 78.7, 78.6, 78.5, 78.4, 78.3, 78.2, 78.1, 78.0, 77.9, 77.8, 77.7, 77.6, 77.5, 77.4, 77.3, 77.2, 77.1, 77.0, 76.9, 76.8, 76.7, 76.6, 76.5, 76.4, 76.3, 76.2, 76.1, 76.0, 75.9, 75.8, 75.7, 75.6, 75.5, 75.4, 75.3, 75.2, 75.1, 75.0, 74.9, 74.8, 74.7, 74.6, 74.5, 74.4, 74.3, 74.2, 74.1, 74.0, 73.9, 73.8, 73.7, 73.6, 73.5, 73.4, 73.3, 73.2, 73.1, 73.0, 72.9, 72.8, 72.7, 72.6, 72.5, 72.4, 72.3, 72.2, 72.1, 72.0, 71.9, 71.8, 71.7, 71.6, 71.5, 71.4, 71.3, 71.2, 71.1, 71.0, 70.9, 70.8, 70.7, 70.6, 70.5, 70.4, 70.3, 70.2, 70.1, 70.0, 69.9, 69.8, 69.7, 69.6, 69.5, 69.4, 69.3, 69.2, 69.1, 69.0, 68.9, 68.8, 68.7, 68.6, 68.5, 68.4, 68.3, 68.2, 68.1, 68.0, 67.9, 67.8, 67.7, 67.6, 67.5, 67.4, 67.3, 67.2, 67.1, 67.0, 66.9, 66.8, 66.7, 66.6, 66.5, 66.4, 66.3, 66.2, 66.1, 66.0, 65.9, 65.8, 65.7, 65.6, 65.5, 65.4, 65.3, 65.2, 65.1, 65.0, 64.9, 64.8, 64.7, 64.6, 64.5, 64.4, 64.3, 64.2, 64.1, 64.0, 63.9, 63.8, 63.7, 63.6, 63.5, 63.4, 63.3, 63.2, 63.1, 63.0, 62.9, 62.8, 62.7, 62.6, 62.5, 62.4, 62.3, 62.2, 62.1, 62.0, 61.9, 61.8, 61.7, 61.6, 61.5, 61.4, 61.3, 61.2, 61.1, 61.0, 60.9, 60.8, 60.7, 60.6, 60.5, 60.4, 60.3, 60.2, 60.1, 60.0, 59.9, 59.8, 59.7, 59.6, 59.5, 59.4, 59.3, 59.2, 59.1, 59.0, 58.9, 58.8, 58.7, 58.6, 58.5, 58.4, 58.3, 58.2, 58.1, 58.0, 57.9, 57.8, 57.7, 57.6, 57.5, 57.4, 57.3, 57.2, 57.1, 57.0, 56.9, 56.8, 56.7, 56.6, 56.5, 56.4, 56.3, 56.2, 56.1, 56.0, 55.9, 55.8, 55.7, 55.6, 55.5, 55.4, 55.3, 55.2, 55.1, 55.0, 54.9, 54.8, 54.7, 54.6, 54.5, 54.4, 54.3, 54.2, 54.1, 54.0, 53.9, 53.8, 53.7, 53.6, 53.5, 53.4, 53.3, 53.2, 53.1, 53.0, 52.9, 52.8, 52.7, 52.6, 52.5, 52.4, 52.3, 52.2, 52.1, 52.0, 51.9, 51.8, 51.7, 51.6, 51.5, 51.4, 51.3, 51.2, 51.1, 51.0, 50.9, 50.8, 50.7, 50.6, 50.5, 50.4, 50.3, 50.2, 50.1, 50.0, 49.9, 49.8, 49.7, 49.6, 49.5, 49.4, 49.3, 49.2, 49.1, 49.0, 48.9, 48.8, 48.7, 48.6, 48.5, 48.4, 48.3, 48.2, 48.1, 48.0, 47.9, 47.8, 47.7, 47.6, 47.5, 47.4, 47.3, 47.2, 47.1, 47.0, 46.9, 46.8, 46.7, 46.6, 46.5, 46.4, 46.3, 46.2, 46.1, 46.0, 45.9, 45.8, 45.7, 45.6, 45.5, 45.4, 45.3, 45.2, 45.1, 45.0, 44.9, 44.8, 44.7, 44.6, 44.5, 44.4, 44.3, 44.2, 44.1, 44.0, 43.9, 43.8, 43.7, 43.6, 43.5, 43.4, 43.3, 43.2, 43.1, 43.0, 42.9, 42.8, 42.7, 42.6, 42.5, 42.4, 42.3, 42.2, 42.1, 42.0, 41.9, 41.8, 41.7, 41.6, 41.5, 41.4, 41.3, 41.2, 41.1, 41.0, 40.9, 40.8, 40.7, 40.6, 40.5, 40.4, 40.3, 40.2, 40.1, 40.0, 39.9, 39.8, 39.7, 39.6, 39.5, 39.4, 39.3, 39.2, 39.1, 39.0, 3</p> |
|--------------------------------------------------------------------------------------------------------------------------------------------------------------------------------------------------------------------------------------------------------------------------------------------------------------------------------------------------------------------------------------------------------------------------------------------------------------------------------------------------------------------------------------------------------------------------------------------------------------------------------------------------------------------------------------------------------------------------------------------------------------------------------------------------------------------------------------------------------------------------------------------------------------------------------------------------------------------------------------------------------------------------------------------------------------------------------------------------------------------------------------------------------------------------------------------------------------------------------------------------------------------------------------------------------------------------------------------------------------------------------------------------------------------------------------------------------------------------------------------------------------------------------------------------------------------------------------------------------------------------------------------------------------------------------------------------------------------------------------------------------------------------------------------------------------------------------------------------------------------------------------------------------------------------------------------------------------------------------------------------------------------------------------------------------------------------------------------------------------------------------------------------------------------------------------------------------------------------------------------------------------------------------------------------------------------------------------------------------------------------------------------------------------------------------------------------------------------------------------------------------------------------------------------------------------------------------------------------------------------------------------------------------------------------------------------------------------------------------------------------------------------------------------------------------------------------------------------------------------------------------------------------------------------------------------------------------------------------------------------------------------------------------------------------------------------------------------------------------------------------------------------------------------------------------------------------------------------------------------------------------------------------------------------------------------------------------------------------------------------------------------------------------------------------------------------------------------------------------------------------------------------------------------------------------------------------------------------------------------------------------------------------------------------------------------------------------------------------------------------------------------------------------------------------------------------------------------------------------------------------------------------------------------------------------------------------------------------------------------------------------------------------------------------------------------------------------------------------------------------------------------------------------------------------------------------------------------------------------------------------------------------------------------------------------------------------------------------------------------------------------------------------------------------------------------------------------------------------------------------------------------------------------------------------------------------------------------------------------|

|                                                                                                                       |                                                                                                                                                                                                                                                                                                                                                                                |
|-----------------------------------------------------------------------------------------------------------------------|--------------------------------------------------------------------------------------------------------------------------------------------------------------------------------------------------------------------------------------------------------------------------------------------------------------------------------------------------------------------------------|
| 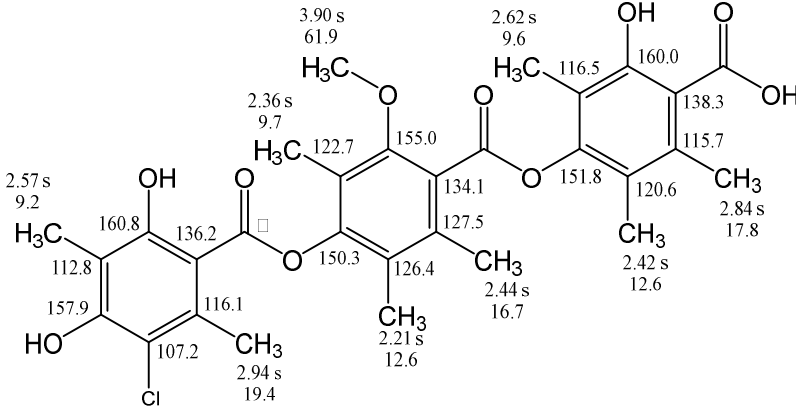                                    | White powder; UV (CAN) $\lambda_{max}$ : 215.8, 276.1, 307.0 nm; HRESIMS: $m/z$ 587.1719/589.1646 $[M+H]^+$ 3:1 (calcd for $C_{30}H_{32}ClO_{10}$ , 587.1679); $^1H$ NMR and $^{13}C$ NMR (500 and 125 MHz, $DMSO-d_6$ ) [52].                                                                                                                                                 |
| <b>3-Hydroxy-2,5-dimethylphenyl 4-[(2,4-dihydroxy-3,6-dimethylbenzoyl)oxy]-2-hydroxy-3,6-dimethylbenzoate (80)</b>    |                                                                                                                                                                                                                                                                                                                                                                                |
|                                    | UV (MeOH) $\lambda_{max}$ : 226 (4.39), 278 (4.13), 310 (3.81); IR (KBr) $\gamma_{max}$ : 3419, 2925, 1664, 1623, 1583, 1147, 1257 $cm^{-1}$ ; ESIMS: $m/z$ 465 $[M-H]^-$ , 301 (25), 163 (100); ESITOFMS: $m/z$ 465.1522 $[M-H]^-$ (calcd for $C_{26}H_{25}O_8$ , 465.1548); $^1H$ and $^{13}C$ NMR (400 and 100 MHz, $CDCl_3$ and $CD_3OD$ ) [49].                           |
| <b>3-Hydroxy-2,4,5-trimethylphenyl 4-[(2,4-dihydroxy-3,6-dimethylbenzoyl)oxy]-2-hydroxy-3,6-dimethylbenzoate (81)</b> |                                                                                                                                                                                                                                                                                                                                                                                |
|                                   | White amorphous powder; UV $\lambda_{max}$ : 226 (4.37), 278 (4.12), 310 (3.82) nm; IR (KBr) $\gamma_{max}$ : 3421, 2931, 1706, 1654, 1623, 1585, 1143, 1257 $cm^{-1}$ ; ESIMS: $m/z$ 479 $[M-H]^-$ , 315 (20), 163 (100); ESI-TOFMS: $m/z$ 479.1674 $[M-H]^-$ (calcd for $C_{27}H_{27}O_8$ , 479.1705); $^1H$ and $^{13}C$ NMR (400 and 100 MHz, $CDCl_3$ and $CD_3O$ ) [49]. |
| <b>Gyrophoric acid (82)</b>                                                                                           |                                                                                                                                                                                                                                                                                                                                                                                |
|                                   | Colorless materials; $^1H$ and $^{13}C$ NMR (500 and 125 MHz, $DMSO-d_6$ ) [71,72].                                                                                                                                                                                                                                                                                            |



**Trivarc acid (83)**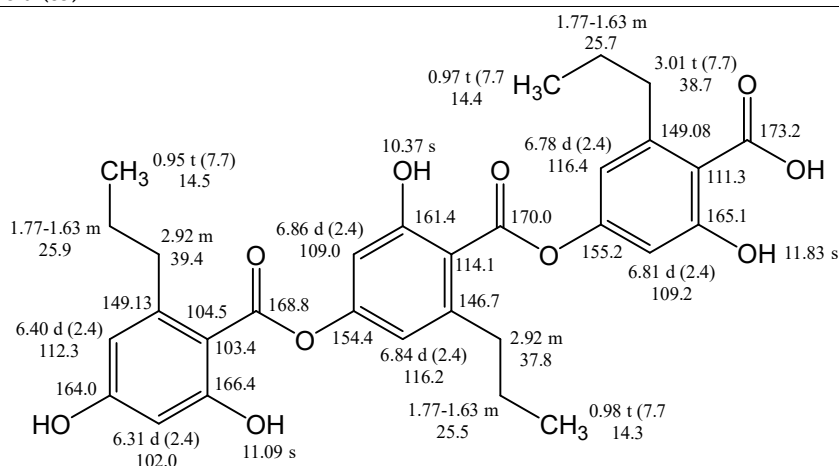

White amorphous powder; ESIMS: *m/z* 551 [M-H]<sup>-</sup>; <sup>1</sup>H NMR and <sup>13</sup>C NMR (500 and 125 MHz, acetone-*d*<sub>6</sub>) [25].

**Cytionic acid A (84)**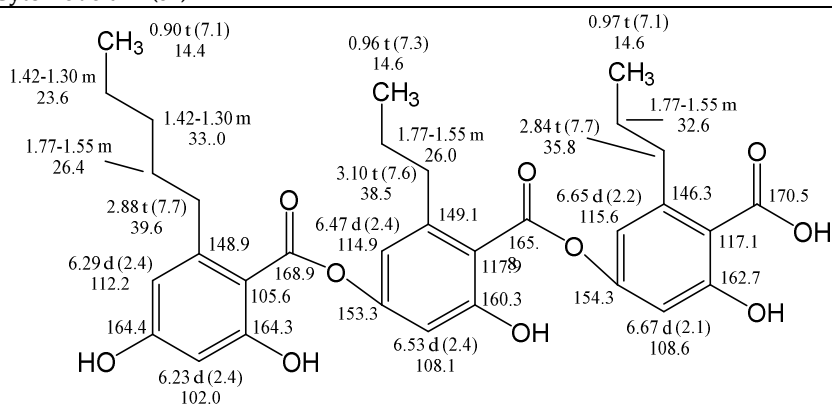

White powder; UV (MeOH)  $\lambda_{\max}$  (log  $\epsilon$ ): 211 (4.7), 253 (4.1), 284 (3.9) nm; IR (KBr)  $\gamma_{\max}$ : 3450, 1766, 1762, 1651, 1575, 1557, 1538, 1135, 1035, 824 cm<sup>-1</sup>; (-) ESIMS: *m/z* 579 [M-H]<sup>-</sup> (2.2%), 195 (100%), 177 (54.1%), 401 (42.2%), 151 (32.4%), 205 (26.8%), 133 (14.6%), 223 (15.5%), 373 (9.2%); (-) ESIMS: *m/z* 579: 579, 401, 373, 223, 195; (-) ESIMS: *m/z* 401: 195, 223, 401; ESIMS-MS: *m/z* 373, 195, 373; (-) ESIMS: *m/z* 223, 223, 179; (-) ESIMS: *m/zr* 195, 151, 195; (-) APCIMS: *m/z* 151 (100%), 195 (91.5%), 179 (48.3%), 137 (31.3%), 177 (22.5%), 223 (16.2%), 205 (18.6%); (-) HRMS: *m/z* 579.2214 [M-H]<sup>-</sup> (calcd for C<sub>32</sub>H<sub>35</sub>O<sub>10</sub>, 579.2227) (<sup>1</sup>H and <sup>13</sup>C NMR (400 and 100 MHz, CD<sub>3</sub>OD) [73].

**Cytionic acid B (85)**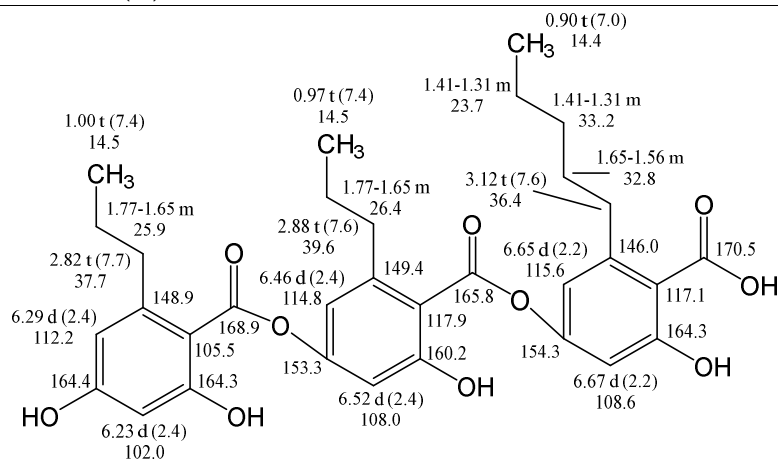

White powder; UV (MeOH)  $\lambda_{\max}$  (log  $\epsilon$ ): 212 (4.7), 250 (4.1), 286 (3.9) nm; IR (KBr)  $\gamma_{\max}$ : 3450, 1765, 1760, 1651, 1574, 1557, 1538, 1137, 1034, 828 cm<sup>-1</sup>; (-) ESIMS: *m/z* 579 [M-H]<sup>-</sup> (2.0%), 223 (100%), 401 (70.3%), 177 (52.7%), 133 (8.1%); (-) ESIMS: *m/z* 579: 579, 401, 223, 195, 373, 151; (-) ESIMS: *m/z* 401, 401, 223, 195, 177; (-) ESIMS: *m/z* 373, 195, 177, 151; (-) ESIMS: *m/z* 223, 179; (-) APCIMS: *m/z* 223 (100%), 177 (100%), 179 (75.5%), 133 (70.6%), 401 (2.7%); <sup>1</sup>H and <sup>13</sup>C NMR (400 and 100 MHz, CD<sub>3</sub>OD) [73].

**Amidepsine D (86)**

|                                                                                                                      |                                                                                                                                                                                                                                                                                                                                                                                                                                                                                                                                                                                                                                                                                                               |
|----------------------------------------------------------------------------------------------------------------------|---------------------------------------------------------------------------------------------------------------------------------------------------------------------------------------------------------------------------------------------------------------------------------------------------------------------------------------------------------------------------------------------------------------------------------------------------------------------------------------------------------------------------------------------------------------------------------------------------------------------------------------------------------------------------------------------------------------|
| 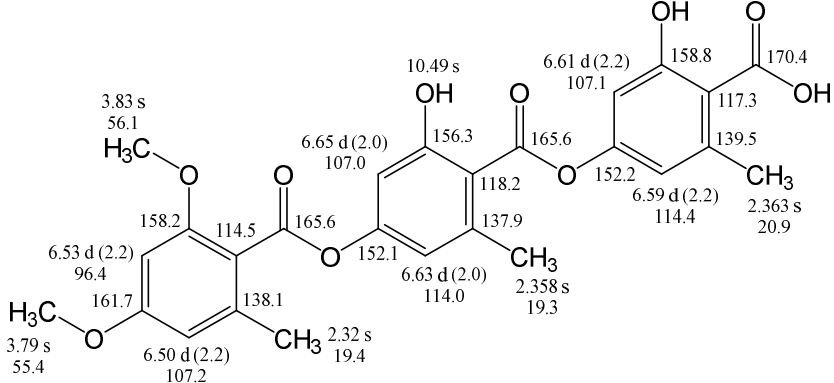                                   | <p>White powder; <math>[\alpha]_D^{25}</math> 0.0 (c 0.1, MeOH); UV (MeOH) <math>\lambda_{max}</math> (<math>\epsilon</math>): 217 (30700), 250 (17700), 294 (8900) nm; IR (KBr) <math>\gamma_{max}</math>: 1668, 1608, 1419, 1246, 1200, 1140 <math>\text{cm}^{-1}</math>; FAMMS: <math>m/z</math> 497 <math>[\text{M}+\text{H}]^+</math>, 519 <math>[\text{M}+\text{Na}]^+</math>, 495 <math>[\text{M}-\text{H}]^-</math>; HRFABMS 495.1294 <math>[\text{M}-\text{H}]^-</math> (cald for <math>\text{C}_{26}\text{H}_{23}\text{O}_{10}</math>, 495.1291) <math>^1\text{H}</math> and <math>^{13}\text{C}</math> NMR (400 and 100 MHz, <math>\text{DMSO}-d_6</math>) [7475].</p>                             |
| <p><b>Amidepsine K (87)</b></p>   | <p>White powder; <math>[\alpha]_D^{25}</math> 0.0 (c 0.1, MeOH); UV (MeOH) <math>\lambda_{max}</math> (<math>\epsilon</math>): 213 (38500), 270 (7900) nm; IR (KBr) <math>\gamma_{max}</math>: 2979, 2935, 2852, 1662, 1610, 1581, 1421, 1248, 1201, 1148 <math>\text{cm}^{-1}</math>; FABMS: <math>m/z</math> 483 <math>[\text{M}+\text{H}]^+</math>, 505 <math>[\text{M}+\text{Na}]^+</math>, 481 <math>[\text{M}-\text{H}]^-</math>; HRFABMS: <math>m/z</math> 483.1274 <math>[\text{M}-\text{H}]^-</math> (cald for <math>\text{C}_{25}\text{H}_{32}\text{O}_{10}</math>, 483.1291); <math>^1\text{H}</math> and <math>^{13}\text{C}</math> NMR (600 and 125 MHz, <math>\text{DMSO}-d_6</math>) [71].</p> |
| <p><b>Amidepsine A (88)</b></p>  | <p>Pale yellow powder; <math>[\alpha]_D^{25}</math> - 10.0 (c 0.1, MeOH); UV (MeOH) <math>\lambda_{max}</math> (<math>\epsilon</math>): 218 (35000), 254 (18000), 282 (10600) nm; IR (KBr) <math>\gamma_{max}</math>: 1660, 1583, 1506, 1410, 1246, 1136 <math>\text{cm}^{-1}</math>; FAMMS <math>m/z</math>: 568 <math>[\text{M}+\text{H}]^+</math>, 590 <math>[\text{M}+\text{Na}]^+</math>, 566 <math>[\text{M}-\text{H}]^-</math>; HRFABMS 566.1662 <math>[\text{M}-\text{H}]^-</math> (cald for <math>\text{C}_{29}\text{H}_{28}\text{O}_{11}\text{N}</math>, 566.1674) <math>^1\text{H}</math> and <math>^{13}\text{C}</math> NMR (400 and 100 MHz, <math>\text{DMSO}-d_6</math>) [74,75].</p>          |
| <p><b>86- Amidepsine B (89)</b></p>                                                                                  |                                                                                                                                                                                                                                                                                                                                                                                                                                                                                                                                                                                                                                                                                                               |

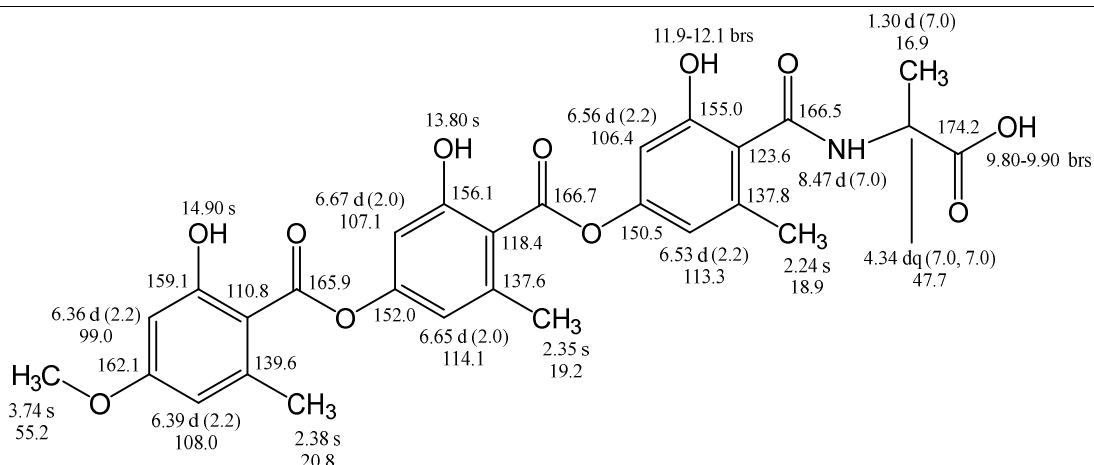

Pale yellow powder;  $[\alpha]_D^{25}$  -16.0 (c 0.1, MeOH); UV (MeOH)  $\lambda_{max}$  ( $\epsilon$ ): 216 (34000), 266 (22160), 305 (11100) nm; IR (KBr)  $\gamma_{max}$ : 1656, 1583, 1400, 1248, 1163, 1144 cm<sup>-1</sup>; FAMMS *m/z*: 554 [M+H]<sup>+</sup>, 576 [M+Na]<sup>+</sup>, 552 [M-H]<sup>-</sup>; HRFABMS: *m/z* 552.1506 [M-H]<sup>-</sup> (calcd for C<sub>28</sub>H<sub>26</sub>O<sub>11</sub>N, 552.1529); <sup>1</sup>H and <sup>13</sup>C NMR (400 and 100 MHz, DMSO-*d*<sub>6</sub>) [74,75].

**Amidepsine B (-):** White powder; mp 153–156 °C;  $[\alpha]_D^{25}$  -17.3 (c 0.1, CH<sub>3</sub>OH); IR (KBr)  $\gamma_{max}$ : 3087, 2937, 2858, 1668, 1610, 1454 cm<sup>-1</sup>; <sup>1</sup>H NMR (270 MHz, CDCl<sub>3</sub>): δ<sub>H</sub> 10.4 (brs, 1H), 8.44 (d, *J* = 6.8 Hz, 1H), 6.68 (brs, 1H), 6.66 (brs, 1H), 6.56 (brs, 1H), 6.53 (brs, 1H), 6.39 (brs, 1H), 6.36 (brs, 1H), 4.35 (m, 1H), 3.74 (s, 3H), 2.45 (s, 3H), 2.38 (s, 3H), 2.35 (s, 3H), 1.31 (d, *J* = 7.1 Hz, 3H); <sup>13</sup>C NMR (75 MHz, CDCl<sub>3</sub>): δ<sub>c</sub> 174.1, 166.7, 166.4, 165.8, 162.1, 159.1, 156.1, 155.0, 152.0, 150.5, 139.6, 137.8, 137.6, 123.5, 118.4, 114.1, 113.3, 110.7, 108.1, 107.1, 106.4, 99.0, 55.2, 47.6, 20.8, 19.2, 18.8 and 16.9; HRFABMS: *m/z* 552.1510 [M-H]<sup>-</sup> (calcd for C<sub>28</sub>H<sub>26</sub>NO<sub>11</sub>, 552.1506) [79].

**Amidepsine B (+):** White powder; mp 156–159 °C;  $[\alpha]_D^{25}$  +10.4 (c 0.1, CH<sub>3</sub>OH); IR (KBr)  $\gamma_{max}$ : 3087, 2937, 2858, 1668, 1610, 1454 cm<sup>-1</sup>; <sup>1</sup>H NMR (270 MHz, CDCl<sub>3</sub>): δ<sub>H</sub> 10.4 (brs, 1H), 8.44 (d, *J* = 6.8 Hz, 1H), 6.68 (brs, 1H), 6.66 (brs, 1H), 6.56 (brs, 1H), 6.53 (brs, 1H), 6.39 (brs, 1H), 6.36 (brs, 1H), 4.35 (m, 1H), 3.74 (s, 3H), 2.45 (s, 3H), 2.38 (s, 3H), 2.35 (s, 3H), 1.31 (d, *J* = 7.1 Hz, 3H); <sup>13</sup>C NMR (75 MHz, CDCl<sub>3</sub>): δ<sub>c</sub> 174.1, 166.7, 166.4, 165.8, 162.1, 159.1, 156.1, 155.0, 152.0, 150.5, 139.6, 137.8, 137.6, 123.5, 118.4, 114.1, 113.3, 110.7, 108.1, 107.1, 106.4, 99.0, 55.2, 47.6, 20.8, 19.2, 18.8 and 16.9; HRFABMS: *m/z* 554.1663 [M+H]<sup>+</sup> (calcd for C<sub>28</sub>H<sub>28</sub>NO<sub>11</sub>, 554.1662) [79].

#### Amidepsine C (90)

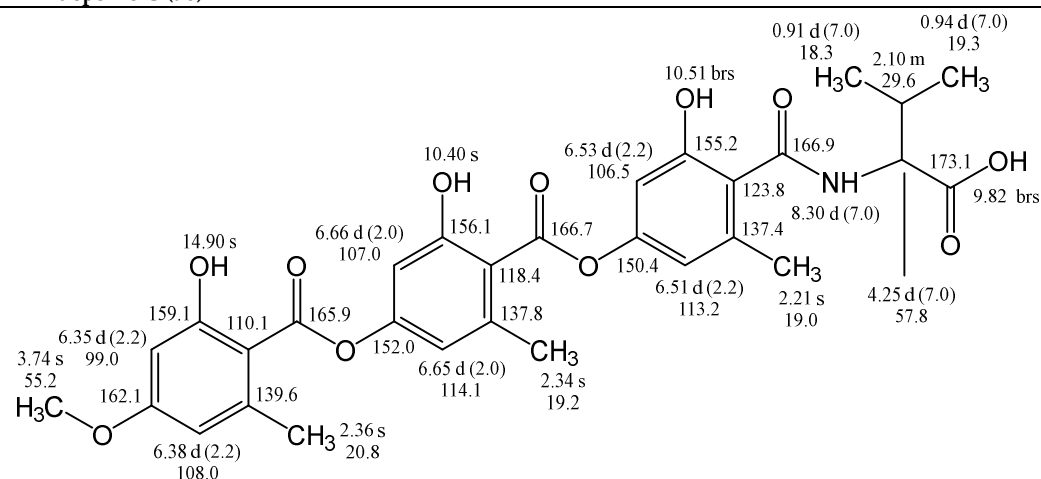

Pale yellow powder;  $[\alpha]_D^{25}$  -94.0 (c 0.1, MeOH); UV (MeOH)  $\lambda_{max}$  ( $\epsilon$ ): 209 (37400), 269 (24200), 306 (12300) nm; IR (KBr)  $\gamma_{max}$ : 1670, 1612, 1583, 1313, 1248, 1140 cm<sup>-1</sup>; FAMMS: *m/z* 582 [M+H]<sup>+</sup>, 604 [M+Na]<sup>+</sup>, 580 [M-H]<sup>-</sup>; HRFABMS: *m/z* 580.1822 (calcd for C<sub>30</sub>H<sub>30</sub>O<sub>11</sub>N, 580.1819) <sup>1</sup>H and <sup>13</sup>C NMR (400 and 100 MHz, DMSO-*d*<sub>6</sub>) [74,75].

#### Amidepsine E (91)

|                                 |                                                                                                                                                                                                                                                                                                                                                                                                                                                                                                                                                                                                          |
|---------------------------------|----------------------------------------------------------------------------------------------------------------------------------------------------------------------------------------------------------------------------------------------------------------------------------------------------------------------------------------------------------------------------------------------------------------------------------------------------------------------------------------------------------------------------------------------------------------------------------------------------------|
|                                 | <p>Pale yellow powder; mp 215 °C; <math>[\alpha]_D^{25}</math> -7.0 (c 0.1, MeOH); <math>\lambda_{max}</math> (<math>\epsilon</math>): 206 (75500), 246 (14000), 281 (10400) nm; IR (KBr) <math>\gamma_{max}</math>: 3410, 2927, 1732, 1597, 1462, 1327, 1250, 1139 <math>\text{cm}^{-1}</math>; FABMS <math>m/z</math>: 582 (M+H)<sup>+</sup>, 604 (M+Na)<sup>+</sup>, 580 (M-H)<sup>-</sup>; HRFABMS: <math>m/z</math> 582.1977 (calcd for C<sub>30</sub>H<sub>32</sub>O<sub>11</sub>N, 582.1975); <sup>1</sup>H and <sup>13</sup>C NMR (400 and 100 MHz, DMSO-<i>d</i><sub>6</sub>) [76].</p>         |
| <p><b>Amidepsine F (92)</b></p> | <p>Pale yellow powder; <math>[\alpha]_D^{25}</math> -10.0 (c 0.1, MeOH); UV (MeOH) <math>\lambda_{max}</math> (<math>\epsilon</math>): 204 (48000), 281 (5600) nm; IR (KBr) <math>\gamma_{max}</math>: 3379, 2968, 2956, 2927, 2858, 1739, 1599, 1456, 1257, 1038 <math>\text{cm}^{-1}</math>; FABMS: <math>m/z</math> 730 [M+H]<sup>+</sup>, 752 [M+Na]<sup>+</sup>, 728 [M-H]<sup>-</sup>; HRFABMS: <math>m/z</math> 730.2307 (calcd for C<sub>35</sub>H<sub>40</sub>O<sub>16</sub>N, 730.2347); <sup>1</sup>H and <sup>13</sup>C NMR (600 and 125 MHz, CD<sub>3</sub>OD) [71].</p>                    |
| <p><b>Amidepsine G (93)</b></p> | <p>Pale yellow powder; <math>[\alpha]_D^{25}</math> -13.0 (c 0.1, MeOH); UV (MeOH) <math>\lambda_{max}</math> (<math>\epsilon</math>): 203 (50500), 270 (15500) nm; IR (KBr) <math>\gamma_{max}</math>: 3311, 2929, 2860, 1738, 1657, 1603, 1450, 1657, 1603, 1450, 1254, 1157, 1063 <math>\text{cm}^{-1}</math>; FABMS: <math>m/z</math> 716 [M+H]<sup>+</sup>, 738 [M+Na]<sup>+</sup>, 714 [M-H]<sup>-</sup>; HRFABMS: <math>m/z</math> 716.2146 (calcd for C<sub>34</sub>H<sub>38</sub>O<sub>16</sub>N, 716.2191); <sup>1</sup>H and <sup>13</sup>C NMR (600 and 125 MHz, CD<sub>3</sub>OD) [71].</p> |
| <p><b>Amidepsine H (94)</b></p> |                                                                                                                                                                                                                                                                                                                                                                                                                                                                                                                                                                                                          |

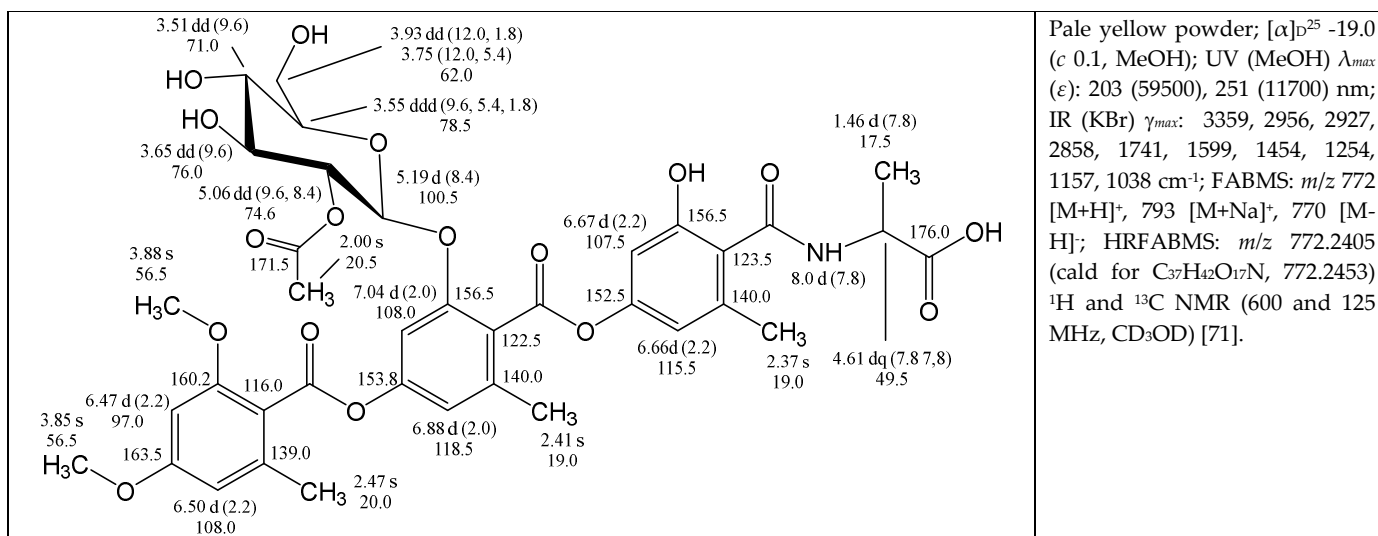

## Amidepsine I (95)

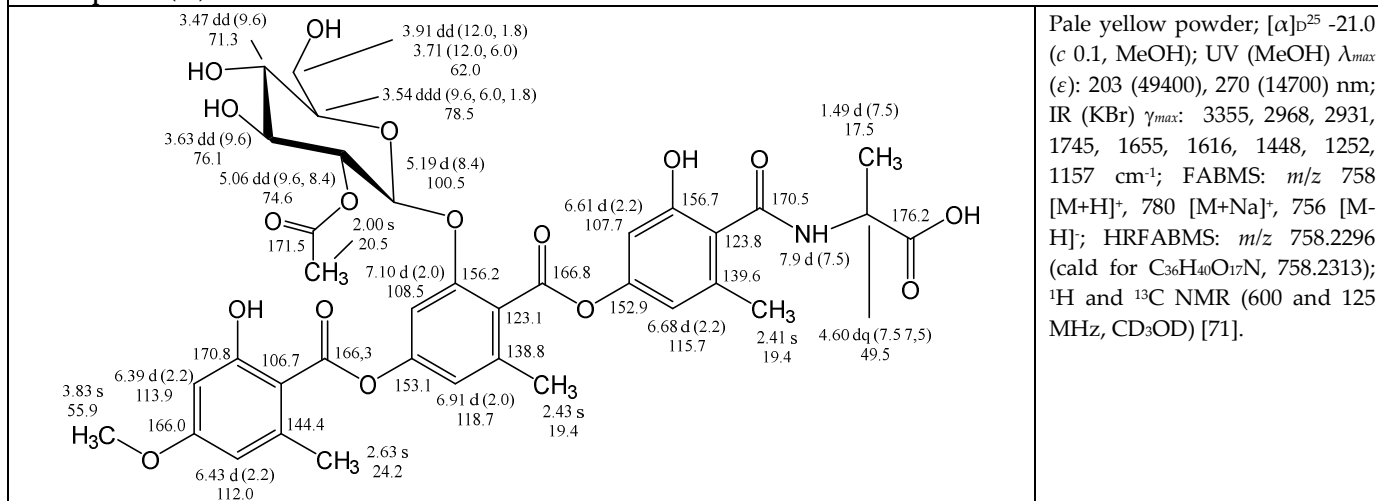

## Amidepsine J (96)

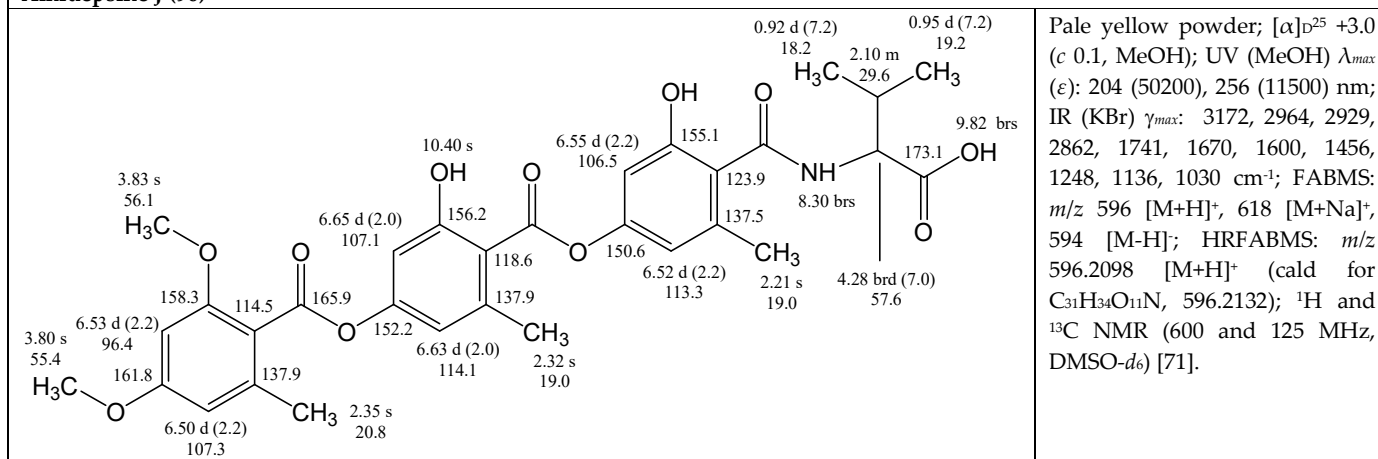

## CJ-21,164 (97)

|                                                                                                                                                                                                                                                                                                                                                                                                                                                                                                                                                                      |                                                                                                                                                                                                                                                                                                                                                                                                                                                                                                                                                                                                                                                                                                                                                            |
|----------------------------------------------------------------------------------------------------------------------------------------------------------------------------------------------------------------------------------------------------------------------------------------------------------------------------------------------------------------------------------------------------------------------------------------------------------------------------------------------------------------------------------------------------------------------|------------------------------------------------------------------------------------------------------------------------------------------------------------------------------------------------------------------------------------------------------------------------------------------------------------------------------------------------------------------------------------------------------------------------------------------------------------------------------------------------------------------------------------------------------------------------------------------------------------------------------------------------------------------------------------------------------------------------------------------------------------|
| <p>NMR in acetone-<math>d_6</math></p>                                                                                                                                                                                                                                                                                                                                                                                                                                                                                                                               | <p>White powder; UV (MeOH) <math>\lambda_{max}</math> (<math>\epsilon</math>): 215 (78800), 252 (29900), 284 (12700), 315 (sh) nm; <math>[\alpha]^{25}_D</math> +63.8 (<math>c</math> 1.00, MeOH); IR (KBr) <math>\gamma_{max}</math>: 3700-2500, 3408, 3250 (sh), 2937, 2937, 1760, 1725 (sh), 1676, 1618, 1583, 1445, 1385, 1348, 1296, 1258, 1190, 1140, 1084, 959, 881, 723 <math>cm^{-1}</math>; HRFABMS: <math>m/z</math> 751.1782 [M-H]<math>^-</math> (calcd for <math>C_{38}H_{36}ClO_{14}</math>, 551.1794); LRFABMS: <math>m/z</math> 753/755 (5:2), 557/559, 393/395, 363/365, 359/361, 199/201, 195, 179, 168, 165; <math>^1H</math> and <math>^{13}C</math> NMR (270 and 68 MHz, acetone-<math>d_6</math> and <math>CD_3OD</math>) [77].</p> |
| <p>NMR in <math>CD_3OD</math></p>                                                                                                                                                                                                                                                                                                                                                                                                                                                                                                                                    |                                                                                                                                                                                                                                                                                                                                                                                                                                                                                                                                                                                                                                                                                                                                                            |
| <b>Thielocin A1α (98)*</b>                                                                                                                                                                                                                                                                                                                                                                                                                                                                                                                                           |                                                                                                                                                                                                                                                                                                                                                                                                                                                                                                                                                                                                                                                                                                                                                            |
| Colorless powder; mp 203-206°C; HR-MS: $m/z$ 997.3861 (calcd 997.3854, $C_{54}H_{60}O_{18}$ ); IR (KBr) $\gamma_{max}$ : 3490, 1740, 1675, 1577, 1155, 1095 $cm^{-1}$ [90]; $^1H$ NMR (400 MHz, $CDCl_3$ - $CD_3OD$ (20:1): $\delta_H$ 2.74 (1H, d, $J$ = 16 Hz), 3.3 (1H, d, $J$ = 16 Hz), 3.83 (9H, s, 3 $\times$ OCH $_3$ ), 3.35 (3H, s, OCH $_3$ ), 1.33 (3H, s), 1.89 (3H, s), 2.23 (3H, s), 2.24 (3H, s), 2.26 (3H, s), 2.27 (3H, s), 2.40 (3H, s), 2.41 (3H, s), 2.27 (6H, s), 2.30 (3H, s), 2.32 (6H each, s) [78].                                         |                                                                                                                                                                                                                                                                                                                                                                                                                                                                                                                                                                                                                                                                                                                                                            |
| <b>Thielocin A1β (99)*</b>                                                                                                                                                                                                                                                                                                                                                                                                                                                                                                                                           |                                                                                                                                                                                                                                                                                                                                                                                                                                                                                                                                                                                                                                                                                                                                                            |
| Colorless powder; mp 203-206°C; HR-MS: $m/z$ 997.3865 (calcd 997.3854, $C_{54}H_{60}O_{18}$ ); IR (KBr) $\gamma_{max}$ : 3440, 1744, 1675, 1575, 1155, 1095 $cm^{-1}$ [90]. $^1H$ NMR (400 MHz, $CDCl_3$ - $CD_3OD$ (20:1): $\delta_H$ 2.72 (1H, d, $J$ = 16 Hz), 3.38 (1H, d, $J$ = 16 Hz), 3.78 (3H, s, OCH $_3$ ), 3.81 (3H, s, OCH $_3$ ), 3.82 (9H, s, 3 $\times$ OCH $_3$ ), 1.52 (3H, s), 1.75 (3H, s), 2.13 (3H, s), 2.20 (3H, s), 2.21 (3H, s), 2.22 (3H, s), 2.25 (3H, s), 2.34 (3H, s), 2.37 (3H, s), 2.40 (3H, s), 2.24 (6H, s), 2.28 (6H each, s) [78]. |                                                                                                                                                                                                                                                                                                                                                                                                                                                                                                                                                                                                                                                                                                                                                            |
| <b>Thielocin A2α (100)*</b>                                                                                                                                                                                                                                                                                                                                                                                                                                                                                                                                          |                                                                                                                                                                                                                                                                                                                                                                                                                                                                                                                                                                                                                                                                                                                                                            |
| Colorless powder; mp 203-206°C; HR-MS: $m/z$ 1175.4479 (calcd 1175.4483, $C_{64}H_{70}O_{21}$ ); UV (MeOH+ dil HCl-MeOH) $\lambda_{max}$ ( $\epsilon$ ): 274.6 (25,100), 316.7 (5,380) nm; UV (dil NaOH-MeOH) $\lambda_{max}$ ( $\epsilon$ ): 260 (sh), 323.3 (52,800) nm; IR (KBr) $\gamma_{max}$ : 3440, 1740, 1605, 1574, 1150, 1090 $cm^{-1}$ [75].                                                                                                                                                                                                              |                                                                                                                                                                                                                                                                                                                                                                                                                                                                                                                                                                                                                                                                                                                                                            |
| <b>Thielocin A2β (101)*</b>                                                                                                                                                                                                                                                                                                                                                                                                                                                                                                                                          |                                                                                                                                                                                                                                                                                                                                                                                                                                                                                                                                                                                                                                                                                                                                                            |
| Colorless powder; mp 204-206°C; HR-MS: $m/z$ 1175.4488 (calcd 1175.4483, $C_{64}H_{70}O_{21}$ ); UV (MeOH+ dil HCl-MeOH) $\lambda_{max}$ ( $\epsilon$ ): 274.5 (22,900, sh), 321 (4,520) nm; UV (dil NaOH-MeOH) $\lambda_{max}$ ( $\epsilon$ ): 260 (sh), 323 (51,300) nm; IR (KBr) $\gamma_{max}$ : 3420, 1745, 1605, 1572, 1147, 1090 $cm^{-1}$ [75].                                                                                                                                                                                                              |                                                                                                                                                                                                                                                                                                                                                                                                                                                                                                                                                                                                                                                                                                                                                            |
| <b>Thielocin A3 (104)*</b>                                                                                                                                                                                                                                                                                                                                                                                                                                                                                                                                           |                                                                                                                                                                                                                                                                                                                                                                                                                                                                                                                                                                                                                                                                                                                                                            |
| Colorless powder; mp 202-205°C; HR-MS: $m/z$ 1175.4488 (calcd 1175.4470, $C_{64}H_{70}O_{21}$ ); UV (MeOH+ dil HCl-MeOH) $\lambda_{max}$ ( $\epsilon$ ): 274.5 (22,512), 318.6 (5,232) nm; UV (dil NaOH-MeOH) $\lambda_{max}$ ( $\epsilon$ ): 255 (sh), 323 (29,825) nm; IR (KBr) $\gamma_{max}$ : 3440, 1743, 1657, 1608, 1576, 1097 $cm^{-1}$ [75].                                                                                                                                                                                                                |                                                                                                                                                                                                                                                                                                                                                                                                                                                                                                                                                                                                                                                                                                                                                            |
| <b>Thielocin B1 (105)*</b>                                                                                                                                                                                                                                                                                                                                                                                                                                                                                                                                           |                                                                                                                                                                                                                                                                                                                                                                                                                                                                                                                                                                                                                                                                                                                                                            |
| Colorless powder; mp 175-182°C; HR-MS: $m/z$ 967.3754 (calcd 967.3749, $C_{53}H_{58}O_{17}$ ); UV (MeOH+dil HCl-MeOH) $\lambda_{max}$ ( $\epsilon$ ): 275 (24,150), 323 (5,120) nm; UV (dil NaOH-MeOH) $\lambda_{max}$ ( $\epsilon$ ): 248 (21,250, sh), 331 (32,650); IR (KBr) $\gamma_{max}$ : 3424, 1742, 1659, 1610, 1152, 1096 $cm^{-1}$ [75].                                                                                                                                                                                                                  |                                                                                                                                                                                                                                                                                                                                                                                                                                                                                                                                                                                                                                                                                                                                                            |

|                                                                                                                                                                                                                                                                                                           |
|-----------------------------------------------------------------------------------------------------------------------------------------------------------------------------------------------------------------------------------------------------------------------------------------------------------|
| Thielocin B2 (106)*                                                                                                                                                                                                                                                                                       |
| Colorless powder; mp 180–186°C; HR-MS: $m/z$ 967.3751 (calcd 967.3749, C <sub>53</sub> H <sub>58</sub> O <sub>17</sub> ); UV (MeOH+dil HCl-MeOH) $\lambda_{max}$ ( $\epsilon$ ): 245 (24,830 sh), 325 (3,579) nm; IR (KBr) $\gamma_{max}$ : 3440, 1775, 1734, 1665, 1610, 1150 cm <sup>-1</sup> [75 121]. |
| Thielocin B3 (107)*                                                                                                                                                                                                                                                                                       |
| Colorless powder; mp 194–197°C; HR-MS: $m/z$ 1131.4226 (calcd 1131.4226, C <sub>62</sub> H <sub>66</sub> O <sub>20</sub> ); UV (MeOH+ dil HCl-MeOH) $\lambda_{max}$ ( $\epsilon$ ): 276 (39,760), 306 (11,690 sh) nm; IR (KBr) $\gamma_{max}$ : 3410, 1740, 1650, 1610, 1143, 1094 cm <sup>-1</sup> [75]. |

\* The spectral data were published in Japanese language [75].

## References

120. Nazir, M.; Sultan, M.; Riaz, N.; Hafeez, M.; Hussain, H.; Ahmed, I.; Schulz, B.; Draeger, S.; Jabbar, A.; Krohn, K. Depsitinuside: A new depside galactoside from an endophytic fungus isolated from *Viburnum tinus*. *J. Asian. Nat. Prod. Res.* **2011**, *13*, 1056–1060.
121. Narui, T.; Sawada, K.; Takatsuki, S.; Okuyama, T.; Culberson, C.F.; Culberson, W.L.; Shibata, S. NMR assignments of depsides and tridepsides of the lichen family Umbilicariaceae. *Phytochemistry* **1998**, *48*, 815–822.
